1 The ABCE1 capsid assembly pathway is conserved between primate lentiviruses and the non-primate  
2 lentivirus feline immunodeficiency virus

3

4 Running title: FIV forms ABCE1-containing assembly intermediates

5

6 Jonathan C. Reed<sup>a</sup>#, Nick Westergreen<sup>a</sup>, Brook C. Barajas<sup>b</sup>, Dylan Ressler<sup>a</sup>, Daryl Phuong<sup>b</sup>, John V.  
7 Swain<sup>a</sup>, Vishwanath R. Lingappa<sup>a</sup>, Jaisri R. Lingappa<sup>b</sup>

8

9 Prosetta Biosciences, San Francisco, California, USA<sup>a</sup>; Department of Global Health, University of  
10 Washington, Seattle, WA, USA<sup>b</sup>

11 #Address correspondence to Jonathan C. Reed, [jreed@prosetta.com](mailto:jreed@prosetta.com)

12

13 Word count for abstract: 250

14 Word count for importance: 148

15 Word count for text: 9347

16

17

18

19

20

21

22

23

24 **Abstract**

25       During immature capsid assembly in cells, the Gag protein of HIV-1 and other primate lentiviruses  
26 co-opts a host RNA granule, forming a pathway of assembly intermediates that contains host components,  
27 including two cellular enzymes shown to facilitate assembly, ABCE1 and DDX6. Here we asked whether  
28 a non-primate lentivirus, feline immunodeficiency virus (FIV), also forms such RNA-granule-derived  
29 intracellular capsid assembly intermediates. First, we found that, unlike for HIV-1, the FIV completed  
30 immature capsid and the largest putative assembly intermediate are unstable during analysis. Next, we  
31 identified *in situ* cross-linking conditions that overcame this problem and revealed the presence of FIV  
32 Gag complexes that correspond in size to early and late HIV-1 assembly intermediates. Because  
33 assembly-defective HIV-1 Gag mutants are arrested at specific intracellular assembly intermediates, we  
34 asked if a similar arrest is also observed for FIV. We analyzed four FIV Gag mutants, including three not  
35 previously studied that we identified based on sequence and structural similarity to HIV-1 Gag, and found  
36 that each is assembly-defective and arrested at the same intermediate as the corresponding HIV-1 mutant.  
37 Further evidence that these FIV Gag-containing complexes correspond to assembly intermediates came  
38 from co-immunoprecipitation studies demonstrating that FIV Gag is associated with ABCE1 and DDX6,  
39 as shown previously for HIV-1. Finally, we validated these co-immunoprecipitations with a proximity  
40 ligation assay that revealed co-localization between assembly-competent FIV Gag and ABCE1 *in situ*.  
41 Together, these data offer novel structure-function insights and indicate that primate and non-primate  
42 lentiviruses form intracellular capsid assembly intermediates derived from ABCE1-containing RNA  
43 granules.

44

45

46

47

48

49

50 **Importance**

51 Like HIV-1, FIV Gag assembles into immature capsids; however, it is not known whether FIV Gag  
52 progresses through a pathway of immature capsid assembly intermediates derived from host RNA  
53 granules, as shown for HIV-1 Gag. Here we asked whether FIV Gag forms complexes similar in size to  
54 HIV-1 assembly intermediates and if FIV Gag is associated with ABCE1 and DDX6, two host enzymes  
55 that facilitate HIV-1 immature capsid assembly that are found in HIV-1 assembly intermediates. Our  
56 studies identified FIV Gag-containing complexes that closely resemble HIV-1 capsid assembly  
57 intermediates, showed that known and novel assembly-defective FIV Gag mutants fail to progress past  
58 these putative intermediates, and utilized biochemical and imaging approaches to demonstrate association  
59 of FIV Gag with ABCE1 and DDX6. Thus, we conclude that viral-host interactions important for  
60 immature capsid assembly are conserved between primate and non-primate lentiviruses, and could yield  
61 important targets for future antiviral strategies.

62

63

64

65

66

67

68

69

70

71

72

73

74

75

## 76 **Introduction**

77       The feline immunodeficiency virus (FIV) is one of the most common infectious diseases in domestic  
78 cats with a prevalence in North America of ~2%. The natural history of FIV infection follows a pattern  
79 similar to the human immunodeficiency virus type 1 (HIV-1) starting with an initial acute infection phase,  
80 followed by an asymptomatic phase of variable length, and a terminal phase that results in feline acquired  
81 immunodeficiency syndrome (feline AIDS)(reviewed in (1)). A commercial FIV vaccine has been  
82 developed for cats, but it may not provide complete protection from circulating FIV strains (2, 3). In  
83 infected cats, when less aggressive management fails to prevent recurrent disease, antiretroviral  
84 chemotherapy can be initiated using antiretroviral drugs. The antiretroviral drug typically prescribed is  
85 the HIV-1 reverse transcriptase inhibitor Zidovudine (AZT) (4). Although AZT can improve quality of  
86 life and extend life expectancy, resistance can develop quickly and treatment can have serious side effects  
87 (reviewed in (5)). While most infected cats do not have severe symptoms, given that cats can live  
88 healthier lives with treatment, drugs that specifically and potently inhibit FIV replication could be of  
89 benefit. In addition, since FIV infection of cats can result in AIDS, it has been proposed that such  
90 infection could serve as a useful model system for studying new antiviral treatments and vaccines for  
91 HIV-1.

92       To utilize FIV infection as a model for HIV-1 infection would require knowing the similarities and  
93 differences between the two, which have been defined for some stages of the two viral life cycles  
94 (reviewed in (6)). FIV has some notable differences relative to HIV-1; for example FIV encodes a  
95 dUTPase, which is not found in the primate lentiviruses, and FIV encodes fewer accessory proteins  
96 compared to HIV-1. Additionally FIV encodes OrfA, which may not have a direct HIV-1 ortholog. Here  
97 we were interested in addressing whether mechanisms involved in intracellular immature capsid assembly  
98 are conserved between HIV-1 and FIV. Like all exogenous retroviruses, HIV-1 and FIV, encode three  
99 proteins that carry out essential steps common to all retroviral lifecycles - Gag, Pol, and Env. Gag is the  
100 only viral protein required for immature capsid assembly. The domains of the Gag polyprotein required  
101 for immature capsid assembly have been studied extensively for HIV-1 (reviewed in (7)). The HIV-1

102 matrix domain (MA) confers plasma membrane targeting, and the HIV-1 capsid domain (CA), which  
103 contains an N-terminal and C-terminal subdomain (CA-NTD and CA-CTD, respectively), provides  
104 important Gag-Gag contacts required for the immature capsid structure. The HIV-1 nucleocapsid domain  
105 (NC) mediates both specific interactions with viral genomic RNA and non-specific RNA interactions,  
106 while the HIV-1 late domain (p6) recruits host factors important for budding the virus from infected cells.  
107 FIV Gag encodes the same domains as HIV-1 Gag and mutational studies have confirmed that the FIV  
108 Gag domains (MA, CA, NC, and late domain p2) function similarly to their HIV-1 counterparts (8-11).  
109 For example, the late domain of both viruses encodes a TSG101 binding motif to recruit TSG101 and  
110 ESCRT machinery to promote budding (11). In both cases, full-length Gag in the immature virus  
111 undergoes maturation when the viral protease cleaves Gag into separate domains (MA, CA, p1, NC, and  
112 p2 for FIV; MA, CA, sp1, NC, sp2, and p6 for HIV-1)(12). Importantly, numerous assembly-defective  
113 mutants have been generated in structure–function analyses of HIV-1 Gag (reviewed in (13)), but are  
114 lacking for FIV Gag. Thus, one goal of our study was to generate a diverse set of assembly-defective FIV  
115 Gag point mutants that would serve as tools for studying the mechanism of FIV Gag assembly.

116 If the HIV-1 and FIV Gag proteins are similar, the likelihood of shared intracellular mechanisms of  
117 assembly would be high. At the level of overall amino acid sequence, conservation among different  
118 retroviral Gag proteins is low, with the major homology region of Gag being a notable exception (14-16).  
119 However, known atomic structures of CA subdomains from different retroviruses display a high degree of  
120 conservation (17-19). Thus, conservation of overall CA structure between different retroviruses argues  
121 for shared mechanisms for immature capsid assembly. This could include conservation of specific Gag-  
122 Gag interactions in immature capsids, but also conservation of Gag-host interactions that may facilitate  
123 immature capsid assembly by common mechanisms within cells. To determine whether FIV and HIV-1  
124 Gag assemble via similar mechanisms, here we asked whether intracellular events that occur during HIV-  
125 1 immature capsid assembly are conserved for FIV.

126 HIV-1 immature capsid assembly proceeds via a sequential pathway of post-translational assembly  
127 intermediates (20-22). At steady state, four major intermediates of increasing size can be identified in

128 cells, starting with the first intermediate (~10S), and followed by progression through the subsequent  
129 ~80S, ~150S, and ~500S intermediates to the final completed immature capsid (~750S) (20-22).  
130 Evidence that the complexes observed at steady-state are *bona fide* assembly intermediates come from  
131 pulse-chase studies showing that they are formed sequentially (20, 21), and mutational analyses showing  
132 that all assembly-defective HIV-1 Gag mutants studied to date are arrested at different steps in this  
133 assembly pathway (22-25). Moreover, other components found in the released virus, such as the HIV-1  
134 Vif protein, GagPol, and genomic RNA are also found in assembly intermediates (21, 22, 26). Notably,  
135 host proteins have been shown to play a role in facilitating these events. Immunodepletion studies from  
136 cell-free extracts and dominant negative studies in cells established that the cellular enzyme ATP binding  
137 cassette protein E1 (ABCE1) facilitates HIV-1 immature capsid assembly (26), but its exact mechanism  
138 of action has not been defined. In addition to ABCE1, the cellular DEAD box helicase 6 (DDX6) is also  
139 associated with HIV-1 assembly intermediates (27). Knockdown of DDX6 resulted in reduction of  
140 released immature capsids without affecting steady-state Gag levels, suggesting a role for DDX6 in  
141 facilitating HIV-1 capsid assembly; moreover, rescue of DDX6-depleted cells with wild-type (WT)  
142 DDX6, but not an ATPase mutant of DDX6, established a role for the RNA helicase activity of DDX6 in  
143 promoting HIV-1 immature capsid assembly (27). In keeping with our finding that ABCE1 and DDX6  
144 are associated with Gag in immature capsid assembly intermediates and released upon completion of the  
145 immature capsid, a proteomics study found that ABCE1 and DDX6 are associated with full-length Gag in  
146 cells, but are not present in the virus (28).

147 Interestingly, DDX6 is a well-studied marker found in cellular RNA granules, which are host  
148 complexes involved in regulation and metabolism of RNA in the cytoplasm (reviewed in (29, 30)).  
149 Although ABCE1 was not described previously as an RNA granule protein, immunoprecipitation studies  
150 showed ABCE1 and DDX6 are associated in the absence of assembling Gag (27), suggesting that ABCE1  
151 is also found in some DDX6-containing RNA granules. Consistent with that observation, cytoplasmic  
152 HIV-1 Gag first associates with DDX6 and ABCE1 when Gag co-opts a host complex (here termed an  
153 RNA granule because it contains the RNA granule maker DDX6), thereby forming the ~80S assembly

154 intermediate (27). Gag then targets, along with ABCE1, DDX6 and other RNA granule proteins, to the  
155 plasma membrane (22), where Gag multimerizes. The cellular RNA granule proteins then dissociate  
156 upon completion of the immature capsid, before budding and release (26, 27). If similar RNA granules  
157 are co-opted by FIV during assembly, that would support the utility of the FIV animal model for  
158 identifying compounds that might inhibit both FIV and HIV-1 assembly by interfering with these  
159 intracellular events.

160 Other primate lentiviruses (e.g. HIV-2, SIVmac239, SIVagm) form similar intermediates that are  
161 associated with ABCE1 (31), suggesting that co-opting a host RNA granule at an early stage of immature  
162 capsid assembly is a conserved feature among primate lentiviruses. To date, a role for ABCE1-containing  
163 RNA granules in assembly of other retroviruses has not been shown. The structural conservation of  
164 lentiviral Gags described above led us to ask whether non-primate lentiviruses also co-opt ABCE1- and  
165 DDX6-containing host RNA granules to form immature capsid assembly intermediates. Here we showed  
166 that WT FIV Gag forms complexes in feline cells that are similar in size to the assembly intermediates  
167 formed by HIV-1. To confirm that these complexes behave like assembly intermediates we first  
168 generated assembly-defective FIV Gag mutants that correspond to known assembly-defective HIV-1 Gag  
169 mutants. We then showed that these FIV Gag mutants are arrested at the same assembly intermediates as  
170 the corresponding HIV-1 Gag mutants. Additionally, we demonstrated that FIV Gag is associated with  
171 endogenous ABCE1 and DDX6 by co-immunoprecipitation in feline cells. Lastly, we utilized an FIV  
172 Gag-ABCE1 proximity ligation assay (PLA) to demonstrate the association of assembly-competent, but  
173 not assembly-incompetent, FIV Gag with ABCE1 *in situ* using fluorescence microscopy. Based on these  
174 findings, we propose that FIV Gag co-opts RNA granules containing ABCE1 and DDX6, to form  
175 intracellular assembly intermediates, and that the assembly pathway defined previously for primate  
176 lentiviruses is conserved in a non-primate lentivirus. Given the identification of small molecules that  
177 inhibit rabies virus replication by targeting ABCE1-containing assembly intermediates (32), the  
178 conservation of such intermediates among lentiviruses has important implications for the development of  
179 new antiretroviral compounds.

## 180 **Results**

181 To study FIV immature capsid assembly, we generated three FIV Gag-expressing constructs (Fig.  
182 1A). To generate the first construct (termed FIV), we introduced two previously described modifications  
183 into the FIV-34TF10 proviral clone (33): specifically, we restored ORFA expression (34, 35) and  
184 replaced the native FIV promoter with the CMV promoter to allow for expression in both feline and  
185 human cells (36). The second construct is an FIV proviral clone that contains the two modifications  
186 described above as well as an inactivating mutation in the viral protease (termed FIV pro-). This was  
187 generated because preventing the protease-mediated cleavage of Gag following immature capsid  
188 assembly allows Gag to remain full-length, which makes tracking and quantification by SDS-PAGE  
189 easier (Fig. 1A; (37)). Finally, since Gag alone should be able to make virus-like particles (VLPs), we  
190 also codon-optimized FIV-34TF10A Gag and cloned it into an expression vector to make the third  
191 construct (termed FIV CO-Gag), which expresses FIV Gag in the absence of other viral proteins (Fig.  
192 1A). To validate these three constructs, the feline astrocyte cell line G355-5 was transfected and  
193 analyzed both for steady-state expression of Gag and for VLP production by western blotting (WB) with  
194 an antibody directed against FIV CA-CTD ( $\alpha$ FIV CA). The proviral constructs, FIV and FIV pro-,  
195 resulted in intracellular FIV Gag expression and production of either mature VLPs containing cleaved CA  
196 (~24 kDa, “p24”) or immature VLPs containing uncleaved Gag (~50 kDa, “p50”), respectively (Fig. 1B),  
197 both detected by  $\alpha$ FIV CA. Expression of FIV CO-Gag alone resulted in high steady-state levels of Gag,  
198 as expected, and release of immature VLPs (Fig. 1B). To confirm the integrity of our infectious FIV  
199 construct, we demonstrated that virus released from G355-5 cells transfected with this construct displayed  
200 abundant reverse transcriptase activity (Fig. 1C). Moreover, when used to infect G355-5 cells, this virus  
201 stock caused a spreading infection as indicated by increased reverse transcriptase activity and syncytia  
202 formation over time (D. Ressler and J.C. Reed, unpublished observations). To confirm that the non-  
203 infectious constructs assembled VLPs properly, we used equilibrium centrifugation to determine the  
204 density of immature VLPs produced from cells transfected with these constructs. In our experiments, the  
205 average density of FIV immature VLPs (with envelopes intact) ranged from 1.12-1.16g/mL (N.



206 Westergreen and J.C. Reed, unpublished observations), which is close to the published FIV VLP density  
207 estimate of 1.15 g/mL (Pedersen, 1987). Thus, measurements of reverse transcriptase activity and  
208 buoyant densities showed that all three of our constructs produced properly formed VLPs.

209 Based on studies of HIV-1 assembly intermediates, we expect FIV assembly intermediates to be  
210 smaller than completed FIV immature capsids. For this reason, we first defined the migration of  
211 completed FIV immature capsids in velocity sedimentation gradients used previously to separate HIV-1  
212 assembly intermediates (24). Immature VLPs released from cells expressing FIV CO-Gag or HIV-1 LAI  
213 pro- provirus were isolated from the culture media, de-enveloped with non-ionic detergent to release the  
214 immature capsid, and analyzed by velocity sedimentation. The HIV-1 immature capsids generated in this  
215 manner migrated at ~750S in the velocity sedimentation gradient, as described previously ((20, 24); Fig.  
216 1D, upper panel). However, when the FIV immature capsids generated in this manner were analyzed in  
217 parallel, FIV Gag was found only in the soluble (~10S) region of the gradient (Fig 1D, middle panel).  
218 Given that VLPs of the correct density were observed when envelopes were intact, as described above,  
219 the lack of intact immature capsids following de-envelopment suggested that Gag in FIV immature  
220 capsids disassociates following removal of the viral envelope. Consistent with this hypothesis, immature  
221 capsids produced by de-envelopment of VLPs from cells expressing the FIV pro- proviral clone were also  
222 unstable (N. Westergreen and J.C. Reed, unpublished observations). To examine whether FIV immature  
223 capsids are intrinsically less stable than HIV-1 immature capsids, we used DSP to cross-link FIV  
224 immature capsids to preserve their integrity prior to removal of the viral envelope. Indeed, when velocity  
225 sedimentation was performed after cross-linking, de-enveloped FIV immature capsids migrated at ~750S  
226 (Fig. 1D, lower panel). Thus, FIV immature capsids appear to have a similar sedimentation value as  
227 HIV-1 immature capsids but are more labile, requiring cross-linking for stability after de-envelopment.

228 Having established the S-value of the completed FIV immature capsid, we next asked whether we  
229 could identify putative intracellular FIV assembly intermediates, which should be present transiently in  
230 small quantities and would likely have S-values similar to those of intracellular HIV-1 assembly  
231 intermediates: ~10S, ~80S, ~150S, and ~500S (21, 22, 26). Given the instability of the completed

232 immature capsid we hypothesized that one or more of the putative FIV assembly intermediates might be  
233 unstable. To test this hypothesis, feline G355-5 cells were transfected to express FIV CO-Gag and prior  
234 to harvest were either mock treated or treated with DSP to cross-link putative FIV assembly  
235 intermediates. Harvested lysates were subjected to velocity sedimentation, and analyzed by WB for FIV  
236 Gag. The velocity sedimentation conditions used here are expected to optimally separate ~10S, ~80S,  
237 ~500S complexes; under these conditions, peaks in the ~80S and ~150S regions co-migrate and the  
238 ~500S and ~750S regions overlap. Intracellular steady-state Gag levels in cell lysates from mock treated  
239 and DSP cross-linked cells were comparable (Fig. 2A). In mock treated cell lysates, FIV Gag was found  
240 in complexes corresponding to the HIV-1 ~10S and ~80S assembly intermediates with only faint FIV  
241 Gag bands observed in the ~500S region (Fig. 2B, upper panel). In contrast, the DSP cross-linked cell  
242 lysates contained abundant FIV Gag in complexes corresponding to the HIV-1 ~10S, ~80S, and ~500S  
243 assembly intermediates (Fig 2B, lower panel). Taken together, these data suggest that FIV forms  
244 immature capsid assembly intermediates that are similar in size to previously described HIV-1 assembly  
245 intermediates, but with the larger ~500S FIV intermediate being less stable than its HIV-1 counterpart, as  
246 is the case with the released FIV immature capsid.

247 To determine if putative FIV assembly intermediates could also be detected in cells transfected to  
248 express an FIV proviral clone, we analyzed cross-linked G355-5 cells transfected to express FIV pro-,  
249 using velocity sedimentation and WB of gradient fractions for FIV Gag (Fig 2C, upper panel). As with  
250 FIV CO-Gag, the ~10S, ~80S, and ~500S putative FIV assembly intermediates were detected. In the case  
251 of FIV pro-, the putative ~10S and ~80S intermediates and the ~500S completed immature capsids were  
252 abundant in the cross-linked lysates, with more of the late ~500S putative assembly intermediate and less  
253 of the completed ~750S capsid relative to FIV CO-Gag (Fig. 2B, lower panel). The difference in the  
254 amount of intracellular ~750S completed immature capsids present at steady state could be explained by  
255 budding kinetics that may differ with constructs and cell types, as has been observed for HIV-1 (22, 25,  
256 27). As a positive control, COS-1 cells transfected to express HIV-1 LAI pro- were also analyzed by  
257 velocity sedimentation without prior cross-linking. WB of gradient fractions for HIV-1 Gag revealed the

258 ~10S, ~80S, and ~500S HIV-1 assembly intermediates, as expected (Fig. 2C, lower panel). Moreover,  
259 comparison of results for HIV-1 expressing lysates confirms that FIV Gag forms complexes that are  
260 similar in size to previously defined HIV-1 assembly intermediates, with the late ~500S FIV complex  
261 being less stable than the corresponding HIV-1 late assembly intermediate. Subsequent analyses of  
262 intracellular FIV assembly intermediates were all performed following cross-linking *in situ*.

263 Previously, rigorous pulse-chase studies demonstrated that HIV-1 Gag complexes identified in cell  
264 lysates are part of a pathway of sequentially formed assembly intermediates; moreover, HIV-1 Gag  
265 mutants that are assembly-defective are arrested at different steps of the assembly pathway and  
266 accumulate only those assembly intermediates that precede the point of arrest, further demonstrating the  
267 sequential progression of Gag through the pathway (Fig 3A;(21, 22, 24, 25)). Thus, to further test the  
268 hypothesis that the FIV Gag-containing complexes that we identified in cells (Fig. 2B) are assembly  
269 intermediates, we generated five FIV Gag mutants that are predicted to be either budding-defective or  
270 assembly-defective, and determined the pattern of FIV Gag complexes produced in cells transfected with  
271 each of these mutants. If key assembly-defective FIV Gag mutants are arrested at the same complex as  
272 the corresponding assembly-defective HIV-1 Gag mutant and forms only the FIV Gag-containing  
273 complexes that precede the point of arrest, then FIV Gag complexes are likely part of a pathway of  
274 sequential assembly intermediates analogous to the HIV-1 assembly pathway.

275 To generate a budding-defective mutant (FIV CO-Gag P438A/P441A), we altered the TSG101  
276 binding motif in FIV p2 from PSAP to ASAA, which is known to reduce production of FIV VLPs (Fig.  
277 3B; (11)). Given that the analogous PTAP mutation in HIV-1 inhibits virus budding but not Gag  
278 multimerization (38, 39), we would expect FIV CO-Gag P438A/P441A to be assembly-competent and  
279 therefore form all the assembly intermediates, but subsequently fail to complete budding and release. We  
280 also generated two FIV Gag mutants that are expected to be assembly-defective. One is truncated at the  
281 end of CA, resulting in expression of only MA-CA (FIV CO-Gag MACA; Fig. 3B). We would expect  
282 that, like HIV-1 MACA (Fig. 3A;(22)), FIV MA-CA would fail to produce VLPs, would be arrested as  
283 the ~10S assembly intermediate, and would thereby mark the first step in the assembly pathway.

284 Moreover, a similar truncation mutant in FIV Gag, FIV MA-CA-p1, also does not produce VLPs (9). In  
285 the second FIV Gag mutant, the glycine at position 2 of FIV Gag was substituted with an alanine to  
286 generate FIV CO-Gag G2A (Fig. 3B); this mutation is known to reduce VLP production (8). The  
287 analogous HIV-1 Gag G2A mutation fails to undergo myristoylation and subsequent targeting to the  
288 plasma membrane (PM) site of assembly, and is arrested as a cytosolic ~80S assembly intermediate (Fig.  
289 3B; (22)). Hence, we expected FIV CO-Gag G2A to be arrested at the ~80S assembly intermediate. To  
290 verify that these three constructs express in cells and display the expected phenotype in assembly or  
291 budding, we examined steady-state intracellular Gag levels as well as VLP production (Fig. 3C). The  
292 budding mutant, FIV Gag P438A/P441A, was expressed at a level comparable to WT FIV CO-Gag and  
293 displayed a three-fold reduction in VLP release relative to WT (Fig. 3C). Although this budding defect  
294 was not as profound as observed previously (11), this may reflect differences in cell lines (40). For the  
295 two other FIV Gag mutations described thus far (G2A and MACA), almost no VLPs were released from  
296 transfected cells, despite intracellular Gag levels similar to WT FIV Gag (Fig. 3C), confirming that both  
297 are assembly-defective.

298 Having established that these three FIV Gag mutants (P438A/P441A, G2A, and MACA) display the  
299 expected VLP phenotypes, we expressed them in cells at similar steady-state levels (Fig. 4A) and asked  
300 whether they are arrested in the assembly pathway in a manner similar to the comparable HIV-1 Gag  
301 mutants (Fig. 4B and 4C). Velocity sedimentation analysis of cell lysates revealed that FIV CO-Gag  
302 produces the expected pattern of putative intracellular assembly intermediates, displaying a prominent  
303 ~80S complex and a less prominent ~500S complex as well as the ~750S completed immature capsid. As  
304 expected, the budding-defective P438A/P441A mutant produced all the putative assembly intermediates  
305 formed by FIV CO-Gag, consistent with immature capsid assembly being unaffected by mutation of the  
306 TSG101 binding motif that is important for budding but not assembly. Interestingly, the budding-  
307 defective P438A/P441A mutant accumulated more ~750S completed immature capsids than WT FIV CO-  
308 Gag, consistent with the completed P438A/P441A immature capsids being arrested at the PM before  
309 undergoing release. In contrast, FIV CO-Gag MACA only produced the ~10S complex, and FIV CO-Gag

310 G2A produced only the ~10S and ~80S complexes (Fig. 4B and 4C). Thus, the assembly-incompetent  
311 FIV CO-Gag MACA mutant and assembly-defective FIV CO-Gag G2A mutant were each arrested at the  
312 same Gag-containing complex as their HIV-1 counterparts (Fig. 3A; (22)). Taken together, these data  
313 further support the model that intracellular FIV Gag assembles via a stepwise pathway of assembly  
314 intermediates, analogous to those described previously for HIV-1, and that these assembly intermediates  
315 can be identified at steady state in cell lysates.

316 Given the important role of the CA domain in HIV-1 immature capsid assembly, we also wanted to  
317 identify point mutations in FIV CA that result in assembly defects and determine if they also cause arrest  
318 of FIV Gag in the putative assembly pathway. While point mutations in CA-NTD and -CTD that impair  
319 HIV-1 immature capsid assembly have been defined ((16, 24, 41-45)), they have not yet been identified  
320 for FIV. Such FIV point mutants would allow a finer mapping FIV CA function and would allow us to  
321 compare arrest of FIV and HIV assembly-defective mutants, thereby providing additional insights into  
322 assembly mechanisms. Since high-resolution structures of the HIV-1 CA-NTD and CA-CTD are  
323 available, we sought to identify FIV residues that correspond to known HIV-1 assembly-critical residues  
324 by aligning the structure of the FIV CA subdomains onto the structure of the HIV-1 CA subdomains (Fig.  
325 5A). For CA-CTD, we aligned the published FIV CA-CTD structure (PDB accession number 5DCK;  
326 (18)) with the HIV-1 CA-CTD domains from a published structure of HIV-1 CA (PDB accession number  
327 5L93; (46)). However, because a high-resolution structure of FIV CA-NTD has not been reported, we  
328 generated a model of the FIV CA-NTD structure, using SWISS-MODEL, with the published RELIK CA-  
329 NTD structure as a template (PDB accession number 2XGU; (19)). This FIV CA-NTD model was then  
330 aligned with the published HIV-1 CA-NTD structure (PDB accession number 5L93; (46); Fig. 5A).

331 After aligning the FIV CA subdomain structures on an HIV-1 CA structure (Fig. 5A), we next asked  
332 which residues in the FIV structures most closely correspond to assembly-critical HIV CA residues. In  
333 CA-NTD, residues in helix 4 were of particular interest because helix 4 forms an exposed surface ((44))  
334 and is critical for inter-hexameric CA-NTD contacts in a high-resolution cryoEM structure ((46); Fig.  
335 5B). In keeping with this, the HIV-1 Gag helix 4 mutant E207A/E208A (Fig. 5C) displays reduced VLP

336 production (44) but forms all the assembly intermediates, including the late ~500S assembly intermediate  
337 (22), indicating arrest just prior to formation of the ~750S completed capsid (Fig. 3A). Moreover, a  
338 recent cryoEM structure of HIV-1 capsid suggests that E207 and E208 in CA-NTD helix 4 may  
339 participate in a salt bridge with R150 in CA-NTD helix 1 of a neighboring 3-fold symmetry mate ((46);  
340 Fig. 5D). This interaction may contribute to stabilizing the immature HIV-1 capsid; thus, it is possible  
341 that the observed arrest of the E207/E208 mutant in the assembly pathway is explained by disruption of  
342 this salt bridge. CA-NTD helix 4 is also important for FIV immature capsid assembly since its deletion  
343 reduces VLP production (9). Thus, we chose to mutate the FIV residues Q209/L210 to alanine based on  
344 their alignment with E207/E208 in the superimposed HIV-1 and FIV CA-NTDs structure (Fig. 5A and  
345 C). Additionally, the side chains of Q209/L210 residues had a similar orientation relative to the  
346 corresponding E207/E208 residues in the HIV-1 CA structure (Fig. 5A), further supporting the selection  
347 of Q209/L210 for mutation. Consistent with their similar alignment and orientation, QL (or QM) residues  
348 are highly conserved at this position in FIV variants from domestic cats (present in 312 out of 322 FIV  
349 Gag domestic cat sequences deposited to NCBI; Fig. 5D and Suppl. Table 1). Notably, as described in  
350 the Discussion section, the finding that Q209 in FIV CA-NTD of domestic cats corresponds to E209 in  
351 HIV-1 CA-NTD based on alignment and orientation raises some interesting structural issues, since unlike  
352 glutamic acid, glutamine would not be expected to form a salt bridge in FIV Gag due to its lack of a  
353 negative charge.

354 To test whether the FIV Q209/L210 residues are analogous to the assembly-critical HIV-1 E207/E208  
355 residues, we introduced Q209A/L210A mutation into FIV CO-Gag and examined the effect on VLP  
356 production and progression through the assembly pathway. We found that VLP production by FIV CO-  
357 Gag Q209A/L210A was dramatically reduced despite intracellular Gag expression (Fig. 3C), thus  
358 recapitulating the VLP defect observed for the corresponding HIV-1 mutant (22, 44). When expressed in  
359 cells at similar intracellular levels as WT FIV CO-Gag (Fig. 6A), FIV CO-Gag Q209A/L210A formed the  
360 ~10S, ~80S, and ~500S complexes, but little to no ~750S completed immature capsid, as indicated by  
361 velocity sedimentation analysis (Fig. 6B and C). From these data, we conclude that FIV CO-Gag

362 Q209A/L210A is arrested at the ~500S assembly intermediate, since it forms the ~500S intermediate  
363 (Fig. 6C) but fails to complete assembly and release (Fig. 3C), as observed for the corresponding HIV-1  
364 E207A/E208A mutant (Fig. 3A; (22)).

365 Similarly, we also sought to identify residues in FIV CA-CTD that correspond to assembly-critical  
366 HIV-1 residues. In HIV-1 CA-CTD, CA helix 9 mediates an important inter-hexameric CA-CTD  
367 dimerization interface in the completed immature capsid ((16); Fig. 5B). We would expect that FIV helix  
368 9 also forms this critical CA-CTD dimer interface, especially given that FIV CA-CTD can functionally  
369 replace SIV CA-CTD, as shown with SIV-FIV chimeras (47). It was demonstrated previously that the  
370 W316/M317 mutation within helix 9 of HIV-1 CA inhibits VLP production (22, 44) and arrests HIV-1  
371 Gag assembly at the ~80S intermediate (Fig 3A; (22)). To determine if FIV assembly also depends on  
372 this critical CA-CTD dimerization interface, FIV Gag residues Y311 and L312 were chosen for mutation  
373 based on their alignment with, and similar orientation to, residues W316 and M317 in HIV-1 helix 9 (Fig.  
374 5A and C).

375 When expressed in cells, FIV CO-Gag Y311A/L312A displayed dramatically reduced VLP  
376 production (Fig. 3C), thus recapitulating the VLP defect observed for the analogous HIV-1 Gag  
377 W316/M317 (22, 44). Velocity sedimentation analysis revealed that FIV CO-Gag Y311A/L312A  
378 produced only the ~10S and ~80S complexes, while WT CO-Gag produced 10S, ~80S, and ~500S/750S  
379 intermediates when expressed at similar steady-state intracellular levels and analyzed in parallel (Fig. 6A-  
380 C). Thus, FIV CO-Gag Y311A/L312A is arrested at the ~80S putative assembly intermediate as  
381 observed for the corresponding HIV-1 W316A/M317A mutation (Fig. 3A; (22)). Together, analysis by  
382 velocity sedimentation shows that each of the four assembly-defective Gag mutants that we examined is  
383 arrested at the same assembly intermediate as its HIV-1 counterpart (Figs. 4 and 6; summarized in Fig.  
384 7A).

385 To further confirm that the FIV Gag-containing complexes are assembly intermediates, we asked if  
386 they contain the same cellular proteins found in HIV-1 assembly intermediates. The ~80S and ~500S  
387 HIV-1 capsid assembly intermediates contain several host proteins, of which the best studied are the



388 enzymes ABCE1 (26) and DDX6 (27). Both ABCE1 and DDX6 facilitate events in HIV-1 assembly (26,  
389 27) and serve as markers for assembly intermediates. Thus, we asked whether FIV Gag is also associated  
390 with endogenous ABCE1 and DDX6 in feline G355-5 cells. FIV CO-Gag was expressed in G355-5 cells  
391 and cell lysates were subjected to immunoprecipitation with either antibody to human ABCE1 or  
392 antibody to human DDX6 alongside a non-immune control, followed by WB with an antibody to FIV  
393 CA-CTD to detect co-immunoprecipitated FIV Gag. Because both ABCE1 and DDX6 are highly  
394 conserved between humans and domestic cat (99.8% identity) and the ABCE1 and DDX6 antibodies we  
395 used (described previously (26, 27)) are directed against peptides with 100% identity between humans  
396 and domestic cat, we expected both antibodies to recognize the feline homologs. Indeed, we found that  
397 WT FIV Gag was associated with endogenous feline ABCE1 and DDX6 by immunoprecipitation (Fig.  
398 7B). Thus, like HIV-1 Gag, FIV Gag appears to co-opt an ABCE1- and DDX6-containing RNA granule.

399 The ~10S HIV-1 assembly intermediate, which corresponds to soluble Gag, is not associated with  
400 ABCE1 and DDX6 (26, 27, 31), indicating that HIV-1 Gag likely associates with ABCE1 and DDX6  
401 after it targets to an RNA granule. Given this, we would not expect the assembly-incompetent FIV  
402 MACA, which is arrested at the ~10S assembly intermediate (Fig. 4C), to be associated with ABCE1 and  
403 DDX6. In contrast, we would expect all the other assembly-defective mutants studied here (FIV G2A,  
404 Q209A/L210A and Y311A/L312A) to associate with ABCE1 and DDX6, since they are all arrested at  
405 either the ~80S intermediate (G2A and Y311A/L312A; Fig. 4C and 6C) or the ~500S intermediate  
406 (Q209A/L210A; Fig. 6C). Additionally, the assembly-competent P438A/P441A mutation, which forms  
407 all the assembly intermediates (Fig. 4C), should also associate with ABCE1 and DDX6. Indeed, as  
408 expected, all the FIV Gag mutants we studied here, with the exception of FIV MACA, were associated  
409 with endogenous ABCE1 and DDX6 in feline G355-5 cells by co-immunoprecipitation (Fig. 7B). These  
410 findings support a model in which FIV Gag localizes to an RNA granule that contains ABCE1 and  
411 DDX6, as shown previously for HIV-1.

412 Finally, to validate the association of FIV Gag with ABCE1 we asked whether ABCE1 is co-localized  
413 with Gag in intact cells. For this purpose, we utilized the proximity ligation assay (PLA), which will only



414 produce fluorescent spots at sites where two proteins are within 40 nm of each other *in situ*. Briefly,  
415 proteins of interest (FIV Gag and ABCE1) are labeled with primary antibodies, which in turn are detected  
416 by a pair of secondary antibodies that are each conjugated to one of two complementary oligonucleotides;  
417 the two secondary antibodies are ligated via annealing between the conjugated complementary  
418 oligonucleotides only when the proteins of interest are within 40 nm of one another. Reagents added  
419 subsequently result in a rolling circle amplification product that is recognized by a fluorophore-  
420 conjugated oligonucleotide, creating a punctate fluorescent signal wherever co-localization occurs (Fig.  
421 8A; (48)). Thus, if FIV Gag is in close proximity with ABCE1 within an ABCE1-containing RNA  
422 granule, cells expressing WT FIV Gag would be expected to display abundant Gag-ABCE1 PLA spots.  
423 In contrast, cells expressing the assembly-defective FIV Gag MACA mutant would be expected to display  
424 few PLA spots, since FIV Gag MACA is arrested at the ~10S intermediate and does not associate with  
425 ABCE1 by coIP. To avoid FIV-Env induced cytopathicity (36) that might interfere with the PLA assay,  
426 we utilized proviral constructs that only expressed a truncated form of Env (FIV pro- env-, diagrammed  
427 in Fig. 8A). We found that cells transfected with FIV pro- env- encoding WT Gag (WT, Fig. 8A)  
428 contained an average of 34.9 Gag-ABCE1 PLA spots per cell (Fig. 8B, red spots in Fig. 8C second  
429 column of top row), and concurrent FIV Gag indirect immunofluorescence staining showed that majority  
430 of these PLA spots occurred in cells expressing FIV Gag at low or high levels (Fig. 8C, first and third  
431 column of top row). In contrast, cells transfected with FIV pro- env- encoding the assembly-defective  
432 FIV Gag MACA mutant (MACA, Fig. 8A) contained nearly four-fold fewer Gag-ABCE1 PLA spots per  
433 cell than WT FIV Gag (an average of 9.5 Gag-ABCE1 PLA spots per cell; Fig. 8B, red spots in Fig. 8C  
434 second column of bottom row), despite abundant FIV MACA staining by indirect immunofluorescence  
435 (Fig. 8C, first and third column of bottom row). Note that because FIV WT and mutant Gag and ABCE1  
436 are both present in the ~10S region of velocity sedimentation gradients (Fig. 4C and 6C; J.C. Reed and  
437 J.R. Lingappa, unpublished observations), these proteins may be in proximity to some extent in the  
438 soluble fraction of the cytoplasm, outside of RNA granules. This could explain the presence of a  
439 background level of PLA spots for FIV MACA. These data show that FIV Gag is associated with

440 ABCE1 *in situ*; moreover, together with the co-immunoprecipitation data, the PLA data further support a  
441 model in which assembling FIV Gag co-opts a DDX6 and ABCE1-containing RNA granule.

442

443

444

445

446

447

448

449

450

451

452

453

454

455

456

457

458

459

460

461

462

463

464

465

## 466 Discussion

467 Here we present evidence that, in feline cells, the non-primate lentivirus FIV Gag assembles  
468 immature capsids via a pathway of RNA-granule-derived assembly intermediates, as shown for HIV-1  
469 and other primate lentiviruses (20-22, 26, 27, 31). Support for this comes from four findings: first, FIV  
470 Gag forms complexes in cells that resemble well-studied HIV-1 immature capsid assembly intermediates  
471 in size and shape (Fig. 2); second, assembly-defective FIV Gag mutants are arrested in the putative  
472 assembly pathway and the points of arrest are the same as for the analogous HIV-1 Gag assembly-  
473 defective mutants (Fig. 4 and 6); third, FIV Gag is associated with the RNA granule proteins ABCE1 and  
474 DDX6 by co-immunoprecipitation (Fig. 7B), as observed for HIV-1 Gag in assembly intermediates; and  
475 fourth, assembling FIV Gag colocalizes with ABCE1 *in situ*, while an assembly-defective mutant does  
476 not (Fig. 8). Taken together these data argue that the ~80S and ~500S FIV Gag-containing complexes  
477 correspond to early and late immature capsid assembly intermediates, respectively, and that the immature  
478 assembly pathway defined by studies of HIV-1 is conserved between primate and non-primate  
479 lentiviruses (Fig. 7A). Below we will use the term assemblysome to refer to collectively RNA-granule  
480 derived capsid assembly intermediates of different sizes (e.g. the ~80S and ~500S HIV-1 and FIV  
481 assembly intermediates).

482 Our finding that both primate (HIV-1, HIV-2, SIV) and non-primate (FIV) lentiviruses appear to form  
483 assemblysomes by co-opting the same subclass of ABCE1- and DDX6-containing RNA granules  
484 suggests that many or all Gag proteins have evolved to utilize this cellular complex. While many  
485 questions about these RNA granules remain unanswered, this conservation argues that these granules play  
486 an important role in the retroviral lifecycle. Other types of RNA granules, such as P bodies and stress  
487 granules, transiently store non-translating cellular mRNA (reviewed in (49)); thus, it is possible that these  
488 ABCE1- and DDX6-containing complexes could also be sites for storing non-translating cellular mRNA.  
489 Moreover, because FIV and HIV-1 unspliced RNA resembles cellular mRNA in that it is both capped and  
490 polyadenylated, one might expect unspliced FIV and HIV-1 viral RNA to also be stored in these ABCE1-  
491 and DDX6-containing granules. Consistent with this possibility, unspliced HIV-1 RNA is associated with

492 ABCE1 in these RNA granules (22). Thus, targeting of retroviral Gag proteins to this RNA granule could  
493 be advantageous for a number of reasons. First, assembling Gag could take advantage of cellular  
494 facilitators of immature capsid assembly present in RNA granules, such as ABCE1 and DDX6 with HIV-  
495 1 (22, 25-27). Second, these RNA granules could provide a site in which Gag becomes concentrated,  
496 thereby facilitating Gag-Gag interactions. Third, RNA granule localization could bring assembling Gag  
497 into proximity with granule-associated unspliced retroviral RNA to facilitate packaging of the RNA  
498 genome into the assembling virus. Finally, these RNA granules may also shield retroviral RNA or other  
499 retroviral components from host innate immune sensing.

500 Many viruses are known to utilize RNA granules at various stages of their lifecycles (50). Canonical  
501 RNA granules include stress granules and P bodies, both of which are much larger than the ABCE1- and  
502 DDX6-containing RNA granule from which assembly intermediates are derived. For example, P bodies  
503 range from 100 – 300 nm in size (51) whereas our ~80S assembly intermediate should be approximately  
504 the same size as a ribosome (~25 nm, (52)). Others have reported that HIV-1 Gag is associated with  
505 RNA granule proteins including Staufen1 (53, 54), AGO2 (55), and MOV10 (56). However, HIV-1 Gag  
506 is not found in stress granules (54), whose formation is induced by stress; nevertheless, Gag has been  
507 shown to modulate formation of stress granules (54, 57, 58). Similarly, a recent study reported that HIV-  
508 1 Gag does not co-localize with P bodies by fluorescent microscopy (59). Consistent with that report  
509 (59), our recent PLA studies show that HIV-1 Gag is not typically associated with P bodies although it is  
510 associated with the P body protein DDX6 in much smaller granular structures (Barajas B and Lingappa  
511 JR, unpublished observations). Thus, P bodies, stress granules, and assemblysomes clearly represent  
512 RNA granules of different sizes and functions; however, more work will be needed to understand how  
513 they are related to each other and to the HIV-1 lifecycle. One hypothesis consistent with published data is  
514 that the ABCE1- and DDX6-containing granules that are co-opted by Gag are subunits of P bodies and/or  
515 stress granules that can also exist independent of P bodies and stress granules. In support of this  
516 hypothesis, the ABCE1- and DDX6-containing granules that are co-opted by Gag share at least two  
517 components with P bodies (DDX6 and AGO2 (27)), and DDX6 is also found in stress granules (reviewed

518 in (60)). Thus, this subunit hypothesis would explain why Gag is associated with DDX6 and ABCE1 but  
519 does not co-localize with P bodies or stress granules, and why P bodies and stress granules can be  
520 impacted when Gag is expressed. While future studies will be needed to test these possibilities, the  
521 current study adds to a large body of evidence indicating that a common feature of Gag proteins is their  
522 ability to co-opt a unique ABCE1- and DDX6-containing RNA granule during immature capsid  
523 assembly.

524 The association of HIV-1 Gag with DDX6 and ABCE1 in assemblysomes was shown previously  
525 using co-immunoprecipitation and immunoelectron microscopy (21, 27). Here we showed that, like HIV-  
526 1 Gag, FIV Gag is associated with both of these host enzymes by co-immunoprecipitation. Here for the  
527 first time, we utilized a PLA assay that allowed us to demonstrate co-localization of FIV Gag with  
528 ABCE1 *in situ* using fluorescent microscopy. Unlike direct or indirect fluorescent microscopy, PLA  
529 results in fluorescent spots only when two proteins are in close proximity, thus allowing co-localization to  
530 be quantified even when proteins are present diffusely throughout the cytoplasm. Thus, taken together  
531 two different *in situ* approaches – PLA and immunoelectron microscopy – support the finding that  
532 assembling Gag proteins of various lentiviruses form ABCE1-containing assemblysomes, while  
533 assembly-incompetent MACA Gag mutants do not. Moreover, our PLA results suggest that PLA may be  
534 a promising approach for *in situ* confirmation of other retroviral-host protein associations.

535 Although our study found numerous similarities between FIV and HIV-1, we did find one significant  
536 difference, namely that the late ~500S FIV assembly intermediate and completed FIV immature capsids  
537 were relatively unstable compared to the corresponding HIV-1 complexes. Notably, our study  
538 demonstrated that *in situ* cross-linking overcomes the inherent lability of FIV complexes, allowing these  
539 complexes to be stabilized and analyzed. Thus, the cross-linking approach that we developed and  
540 validated here should allow assemblysomes for these and other retroviral capsids to be isolated and  
541 analyzed intact in the future.

542 The current study also advances our understanding of residues and interfaces critical for assembly of  
543 FIV immature capsids, and may have identified an example of co-evolution that could have structural

544 implications. Previously, it has been shown that E207/E208 in helix 4 of HIV-1 CA-NTD is required for  
545 assembly (44) and for progression past the ~500S step in the assembly pathway (22), consistent with a  
546 study showing that these residues are critical for an inter-hexameric interface formed between helix 4 and  
547 helix 1 of a neighboring 3-fold symmetry mate (46). Here we showed that Q209/L210 in FIV CA-NTD  
548 helix 4 function in a manner analogous to E207/208 in helix 4 of HIV-1 CA-NTD, in that Q209/L210 are  
549 important for VLP production and for progression past the ~500S Gag-containing complex (Fig 6B and  
550 C). However, we also noted a difference in the HIV-1 and FIV residues that refines our understanding of  
551 this interface. Others have proposed that a salt bridge may form between the negatively charged E207  
552 and E208 in helix 4 of HIV-1 CA-NTD and the positively charged R150 in helix 1 of HIV-1 Gag CA-  
553 NTD (E-R salt bridge; (46)); but this salt bridge is unlikely to form between the comparable FIV Gag  
554 residues, Q209/L210 (neither of which is negatively charged), and K152, which is analogous to HIV-1  
555 R150. Our finding that FIV Gag Q209/L210 is required for progression past the ~500S putative assembly  
556 intermediate and may serve a similar function as E207/E208 raises the possibility that a Q209-K152  
557 hydrogen bond (Q-K hydrogen bond) in the FIV immature capsid structure could substitute for the  
558 proposed E-R salt bridge in the HIV-1 immature capsid structure and be sufficient for formation of this  
559 critical inter-hexameric helix1-helix4 CA-NTD interface. If this is the case, then the FIV Q-K hydrogen  
560 bond in place of the E-R salt bridge at the inter-hexameric CA-NTD interface could contribute to the  
561 marked instability of completed FIV immature capsids and the late (but not the early) FIV assembly  
562 intermediates relative to their HIV-1 counterparts, as shown above (Fig. 1D and 2B). While Q209 and  
563 K152 are well conserved in FIV Gag sequences from isolates obtained from domestic cats (*Felis catus*;  
564 Fig. 5D), they are not present in FIV isolates from other felines besides domestic cats with isolates from  
565 lions, cougars, bobcats, and Pallas' cats (*Panthera leo*, *Puma concolor*, *Lynx rufus*, and *Otocolobus*  
566 *manul*, respectively), which more closely resemble HIV-1 at the relevant positions (Fig. 5D). This  
567 observation raises the possibility that the E-R salt bridge could form in FIV Gag isolates from lion,  
568 cougar, bobcat, or Pallas' cat and that the immature FIV capsids formed by those isolates may be more  
569 stable than those from isolates found in domestic cats. Additionally, this might be an example of co-

570 evolved substitutions (18), since helix 1 contains an arginine when helix 4 contains a glutamic acid (e.g.  
571 in HIV-1 and FIV isolates from species besides domestic cat), while helix 1 contains a lysine when helix  
572 4 contains a glutamine (e.g. in most FIV isolates from domestic cats). Notably, arginine forms bonds in  
573 more directions and is therefore thought to be more stabilizing than lysine (61), thus providing another  
574 reason, in addition to the salt bridge, for why the E-R pair may be more stabilizing than the Q-K pair.  
575 Future mutational studies could address whether the instability of FIV immature capsid and the ~500S  
576 assembly intermediate results from having a Q-K pair in place of the E-R pair at the inter-hexameric CA-  
577 NTD interface.

578 Another important HIV-1 interface is the CA-CTD dimer interface, formed by residues W316/M317  
579 in helix 9 of HIV CA (16, 46). Our finding that mutation of the corresponding two hydrophobic residues  
580 (Y311/L312) in FIV CA helix 9 inhibited VLP production and arrested the assembly pathway at the same  
581 assembly intermediate as observed with the HIV-1 CA-CTD dimer interface mutant, argue that helix 9 in  
582 CA-CTD plays a similar role in FIV and HIV-1 immature capsid assembly, and likely forms the dimer  
583 interface in both cases. Although a previous study found that deletion of FIV CA helix 9 and part of helix  
584 10 did not inhibit VLP production (9), deletions and point mutations can have very different phenotypes  
585 and are not always comparable.

586 Finally, a key implication of our findings is that compounds that target the ABCE1- and DDX6-  
587 containing RNA granules co-opted by these lentiviral Gag proteins could have broad acting antiretroviral  
588 activity, inhibiting both primate and non-primate lentiviruses and possibly other retroviruses. Notably,  
589 small molecules that target ABCE1- containing complexes are known to effectively inhibit rabies virus  
590 assembly *in vitro*, thereby providing proof-of-principle that ABCE1-containing assemblysomes are  
591 druggable (32). The finding that rabies virus, HIV-1 and other primate lentiviruses, and the non-primate  
592 lentivirus FIV, all form ABCE1-containing assemblysomes also suggests a much broader conservation of  
593 this mechanism of assembly.

594

595

596 **Materials and Methods**

597 **Construction of proviral and codon-optimized FIV Gag plasmids.** The proviral clone FIV 34TF10A  
598 was obtained from the NIH AIDS Reagent program (NIH AIDS Reagent Program, catalog #1236). The  
599 previously described *orfA* premature stop codon (TGA) in this proviral clone (34) was reverted to  
600 tryptophan (TGG) by overlap extension PCR. This construct was used to generate FIV, in which the FIV  
601 promoter is replaced with CMV promoter, using a previously described strategy (36). To make FIV pro-,  
602 a non-overlapping site-directed mutagenesis approach was used to introduce the D30N mutation into the  
603 FIV protease domain (numbered according to the start of protease)(62). FIV pro- env- was made by  
604 introducing two stop codons in *env* at position 7175 (numbering according to (33) – Genbank accession  
605 number: M25381.1), to generate an Env truncation mutant similar to (63). The G2A mutation was  
606 introduced into FIV pro- env- by overlap extension PCR. FIV MACA pro- env- was made by  
607 introducing two stop codons after L357 at the end of CA by overlap extension PCR. FIV CO-Gag was  
608 ordered as a gene block (Integrated DNA technologies) and cloned into pcDNA3.1/Neo(+) using HindIII  
609 and XbaI. FIV CO-Gag G2A, FIV CO-Gag P438A/P441A, FIV CO-Gag Q209A/L210A, and FIV CO-  
610 Gag Y311A/L312A were made by overlapping site-directed mutagenesis. FIV CO-Gag MACA was  
611 made by introducing a stop codon after L357 at the end of CA by overlapping site-directed mutagenesis.  
612 HIV-1 experiments utilized an HIV-1 LAI provirus that was also *pro-*, *env-*, *vpr-* and contained the  
613 *puromycin* gene in place of *nef*. To generate this construct, XhoI and XbaI were utilized to insert  
614 *puromycin* in the place of *nef* starting with HIV-GFP *env-* (27, 64), resulting in HIV env- puro. The vpr  
615 mutation was made by introducing two stop codons at the NcoI site in *vpr* by overlap extension PCR,  
616 resulting in HIV env- vpr- puro. The protease mutations (D25K, G49W, I50W) were introduced in two  
617 steps by overlap extension PCR, resulting in HIV env- vpr- pro- puro. FIV CO-Gag sequence and the  
618 sequences of the oligo-nucleotides used to generate each mutation are available upon request.

619

620 **Cells and Transfection.** The feline astrocyte cell line G355-5 was obtained from ATCC (CRL-2033),  
621 and maintained in McCoy 5A (modified) medium (Life Technologies, 16600-108) supplemented with



622 10% fetal bovine serum (Thermo Fisher, 26140079). Cells were transfected with 1 to 6  $\mu$ g DNA in 6 cm  
623 dishes using X-treameGENE 9 (Roche, 6365787001). The COS-1 cell line was obtained from ATCC  
624 (CRL-1650), and maintained in DMEM media (Life Technologies, 10566-024) supplemented with 10%  
625 fetal bovine serum (Thermo Fisher, 26140079). The 293T/17 cell line was obtained from ATCC (CRL-  
626 11268), and maintained in DMEM media (Life Technologies, 10566-024) supplemented with 10% fetal  
627 bovine serum (Thermo Fisher, 26140079). COS-1 cells were transfected with 2  $\mu$ g DNA in 6 cm dishes  
628 using PEI as described previously (25). Transfection of 293T/17 cells for the proximity ligation assay is  
629 described below.

630

631 **FIV virus production and RT assay.** G355-5 cells were transfected as described above but in 6-well  
632 plates. Briefly, each well was transfected with either 2  $\mu$ g per well of FIV or mock transfected. At 24  
633 hours post transfection cells were washed with media twice and media was replaced with 4 ml of  
634 complete McCoy 5A. At 144 hours post transfection media was filtered with a 0.45 micron syringe filter,  
635 aliquoted, and stored at -80C. Reverse transcriptase activity in media from FIV or mock transfected cells  
636 was estimated using SG-PERT (65). A set of recombinant RT standards (EMD Millipore catalog#  
637 382129) ranging from 5.12e3 nU/mL to 5.12e9 nU/mL was used to estimate the nU/mL of reverse  
638 transcriptase activity in the FIV stock.

639

640 **Cell lysis and DSP cross-linking.** For all experiments, cells were harvested 24-48 hours post  
641 transfection. When harvested without DSP cross-linking, cells were washed twice with wash buffer  
642 (DPBS with no Calcium and no Magnesium, Thermo Fisher, 14190250) and lysates collected in the  
643 presence of protease inhibitor cocktail (Sigma Aldrich, P8340), Ribolock RNase Inhibitor (Thermo  
644 Fisher, E00381) in 1x lysis buffer (10 mM Tris pH 7.4, 100 mM NaCl, 50 mM KCl, 0.625% NP40).  
645 When harvested with DSP cross-linking verses mock treatment, cells were washed twice with wash  
646 buffer, and treated for 30 minutes either with wash buffer containing 0.1 mM DSP (Thermo Fisher,  
647 22586) and 0.5% DMSO or treated with wash buffer with 0.5% DMSO alone (mock). DSP solution or

648 mock treatment was removed from the cells and the reaction quenched with 1x lysis buffer without  
649 detergent for 15 minutes, and cells were subsequently harvested as described for cells without DSP cross-  
650 linking. Following harvest, cells were sheared 20 times with 18G syringe and clarified by centrifugation  
651 at slow speed (Beckman 22R, F241.5, 200xg, 10 minutes, 4C) followed by centrifugation at high speed  
652 (Beckman 22R, F241.5, 18,000xg, 1 minute, 4C).

653

654 **Virus-like particle harvest.** Culture supernatants were collected 24-48 hours post transfection and  
655 filtered with 0.45 micron PES syringe filter to remove any remaining cells. Virus-like particles were  
656 centrifuged through a 30% sucrose cushion (Beckman SW55Ti, 130,000xg, 30 minutes, 4C). For WB,  
657 virus pellet was harvested directly for analysis by WB with an antibody to FIV CA-CTD (NIH AIDs  
658 Reagent Program, 4814). For velocity sedimentation, virus pellets were resuspended in the presence of  
659 protease inhibitor cocktail (Sigma Aldrich, P8340), Ribolock RNase Inhibitor (Thermo Fisher, E00381)  
660 in 1x PBS (Fisher, BP665-1). Harvested virus pellets were shaken 1000 rpm for 20 minutes at room  
661 temperature to further resuspended VLPs. Resuspended VLPs were clarified by centrifugation (Beckman  
662 22R, F241.5, 18,000xg, 1 minute, 4C). Where indicated, resuspended virus pellets were cross-linked for  
663 30 minutes at room temperature prior to de-enveloping by addition of DSP to a final concentration of  
664 0.125 mM. The cross-linking reaction was quenched with addition of Tris pH 7.4 to a final concentration  
665 of 20 mM. Virus was de-enveloped by treatment with 1/10 volume of lysis buffer with 10x NP40  
666 detergent (10 mM Tris pH 7.4, 100 mM NaCl, 50 mM KCl, 6.25% NP40) followed by incubation on ice  
667 for 15 minutes. De-enveloped virus was clarified by centrifugation (Beckman 22R, F241.5, 18,000xg, 1  
668 minute, 4C).

669

670 **Velocity sedimentation.** Harvested virus pellet or cell lysate were layered on a step gradient (10%, 15%,  
671 20%, 40%, 50%, 66%, and 80% sucrose in lysis buffer) and subjected to velocity sedimentation  
672 (Beckman MLS-50, 217,000xg, 45 minutes, 4°C). Gradients were fractionated from top to bottom and  
673 pelleted material was harvested for WB. Aliquots of fractions and pellet were analyzed by SDS-PAGE,

674 followed by WB with either an antibody to FIV CA-CTD (NIH AIDs Reagent Program, 4814) or  
675 antibody to HIV CA-CTD (NIH AIDs Reagent Program, 1513), as indicated in the figure legends. Gag in  
676 pellet, which likely represents denatured Gag, was not displayed in the quantification of the velocity  
677 sedimentation gradients and represented less than 10% of total Gag signal in the gradient. The method for  
678 estimating the migration of particles with different S values in gradients has been described previously  
679 (20).

680

681 **Immunoprecipitation and western blotting.** Following DSP cross-linking and cell harvest, lysates  
682 were subjected to immunoprecipitation with 1-2  $\mu\text{g}$  of an antibody to ABCE1 (26), DDX6 (Bethyl, A300-  
683 461A), or rabbit IgG antibody (Bethyl, P120-101) by incubating antibody with lysate overnight at 4C  
684 with rotation, followed by incubation with protein-G coupled Dynabeads (Life Technologies, 10004D) for  
685 4 hr with rotation. Beads were then washed twice with 1x lysis buffer and once with 1x lysis buffer  
686 without detergent. Immunoprecipitation elutes were analyzed by WB, with an antibody directed against  
687 FIV CA-CTD (NIH AIDs Reagent Program, 4814). WB signals were detected using Pierce ECL  
688 substrate (Thermo Fisher Scientific) with Carestream Kodak Biomax Light film. For detection of Gag in  
689 total cell lysates, velocity sedimentation fractions, and membrane flotation fractions, WBs were  
690 performed as described above, or using antibodies conjugated to infrared dyes (LI-COR, Lincoln, NE).  
691 Quantification of Gag bands on film was performed using Image Sudio software (LI-COR).

692

693 **Proximity Ligation Assay (PLA)** 293T/17 cells were plated into 6-well dishes containing poly-L-lysine-  
694 coated coverslips with Grace Biolabs CultureWell silicone chambers (Sigma-Aldrich) attached to create  
695 four chambers on each coverslip. Cells were transfected with 3  $\mu\text{g}$  of plasmid per well using PEI as  
696 described previously (25) and 16.5 hours later were fixed for 15 minutes in 4% paraformaldehyde in PBS  
697 pH 7.4, permeabilized in 0.3% Triton X in PBS, pH 7.4 for 10 minutes, and blocked in Duolink blocking  
698 solution (Sigma-Aldrich) at 37°C for 30 min. Cells were incubated in primary antibody (described under  
699 immunoprecipitation method), followed by Duolink reagents (Sigma-Aldrich): oligo-linked secondary

700 antibody, ligation mix, and red amplification/detection mix, with washes in between, as per the Duolink  
701 protocol. For concurrent immunofluorescence (IF), cells were incubated for 15 minutes at RT with  
702 1:1000 Alexafluor 488 anti-mouse secondary antibody following the final 1x Buffer B PLA washes.  
703 Cover slips were mounted using Duolink In Situ Mounting Media with DAPI, sealed to the glass slides  
704 with clear nail polish, allowed to dry for 24 h at RT, and stored at -20°C. Imaging was performed with a  
705 Zeiss Axiovert 200M deconvolution microscope using Zeiss Plan-Apochromat 63X/ aperture 1.4  
706 objective with oil immersion, with AxioVision Rel. 4.8 software. For quantification, five fields  
707 containing at least three IF-positive cells were chosen at random and imaged using identical exposure  
708 times for the red and green channels (red/green exposures were 1 second and 2.5 seconds,  
709 respectively). Images were captured as a Z-stack of five 1- $\mu$ m slices centered on the focal point for the  
710 PLA. Images were deconvolved using the AxioVision software, then central Z-stack image was exported  
711 as tif files, and Image J was used to outline Gag-positive cells in each field. Within those IF positive  
712 cells, the central Z-stack image was used to count the number of PLA “spots”, and quantify IF intensity  
713 where indicated, using Image J. PLA spot number for each field was then normalized to the average IF  
714 intensity within that field, and the results were plotted with error bars representing the SEM for five  
715 fields. Prior to export of the images used in the figures, the gain on all red channels was adjusted to 3 in  
716 the AxioVision software to allow spots to be easily seen by eye. Images were then imported in 8-bit color  
717 into Adobe Illustrator to create the final figure layout, without further adjustments to color balance or  
718 gamma correction. Images shown in figures display an image from the center slice of a Z-stack that is  
719 representative of the mean. Experiment was repeated once, with similar results.

720

721 **Structure Alignment and Sequence Analysis.** FIV-34TF10A Gag CA-NTD was submitted to SWISS-  
722 MODEL (66-69) which uses Blast and HHblits to identify evolutionarily related structures matching the  
723 submitted target sequence. The top scoring template, RELIK CA-NTD (PDB accession number  
724 2XGU.1.A; (19)) was selected for homology modeling using SWISS-MODEL. The resulting FIV CA-  
725 NTD had GMQE score of 0.73, QMEAN score of -0.17, and a normalized QMEAN4 Z-score < 1. Local

726 quality estimates of the model were largely  $> 0.6$ . The FIV CA-NTD model obtained from SWISS-  
727 MODEL and FIV CA-CTD crystal structure (PDB accession number 5DCK;(18)) were separately aligned  
728 with HIV-1 CA structure (PDB accession number 5L93; (46)) using FATCAT (70, 71), resulting in  
729 optimized RMSD of 2.75 Å for the NTD domains and 1.94 Å for the CTD domains. The sequence  
730 alignments from FATCAT are shown in Fig. 5A and the superposed domains, rendered by CCP4MG  
731 (72), are shown in Fig. 5B.

732 For pairwise sequence alignments of human ABCE1 and DDX6 (Genbank accession number:  
733 NP\_001035809.1 and NP\_001244120.1, respectively) with feline ABE1 and DDX6 (Genbank accession  
734 number: XP\_003985024.1 and XP\_011284692.1, respectively), EMBOSS Needle (73) was used with  
735 default settings (73).

736 For FIV Gag alignments, FIV Gag sequences were obtained from NCBI protein database using  
737 the search terms “Feline immunodeficiency virus Gag” resulting in return of 618 records. These records  
738 were then filtered to select only records that at least contained Gag sequence that spanned the residues of  
739 interest (based on FIV Gag sequence in Fig. 5, this include position 152 in helix 1 to position 210 in helix  
740 4), reducing the dataset from 618 to 405 sequences. These records were annotated for species (see  
741 Supplementary Table 1 for accession numbers and species annotation) and then aligned using Clustal  
742 Omega (73).

743

744

745

746

747

748

749

750

751

752 **Acknowledgments:**

753 The following reagents were obtained through the NIH AIDS Reagent Program, Division of AIDS,  
754 NIAID, NIH: FIV-34TF10 from Dr. John Elder; Anti-FIV p24 Monoclonal (PAK3-2C1) from DAIDS,  
755 NIAID (Custom Monoclonals, Inc.); Anti-HIV-1 p24 Hybridoma (183-H12-5C) from Dr. Bruce  
756 Chesebro and Dr. Hardy Chen. These studies were funded by Prosetta Biosciences and by NAID RO1  
757 AI106397 to JRL. Neither of the funders (Prosetta or NIH) had a role in study design, data collection and  
758 interpretation, or the decision to submit the work for publication.

759

760

761

762

763

764

765

766

767

768

769

770

771

772

773

774

775

776

777

778 **References:**

- 779 1. **Katrin H.** 2012. Clinical Aspects of Feline Retroviruses: A Review. *Viruses* **4**:2684-2710.
- 780 2. **Elizabeth WU, Marcus M, James KC, Janet KY.** 2008. Advances in FIV vaccine technology.  
781 *Veterinary Immunology and Immunopathology* **123**:65-80.
- 782 3. **Dunham SP, Bruce J, MacKay S, Golder M, Jarrett O, Neil JC.** 2006. Limited efficacy of an  
783 inactivated feline immunodeficiency virus vaccine. *Veterinary Record* **158**:561-562.
- 784 4. **Levy J, Crawford C, Hartmann K, Hofmann-Lehmann R, Little S, Sundahl E, Thayer V.**  
785 2008. 2008 American Association of Feline Practitioners' feline retrovirus management  
786 guidelines. *J Feline Medicine Surg* **10**.
- 787 5. **Katrin H, Anita W, Michèle B.** 2015. Efficacy of Antiviral Drugs against Feline  
788 Immunodeficiency Virus. *Veterinary Sciences* **2**:456-476.
- 789 6. **Dorothee B.** 2014. FIV in cats – a useful model of HIV in people? *Veterinary Immunology and*  
790 *Immunopathology* **159**:171-179.
- 791 7. **Freed EO.** 2015. HIV-1 assembly, release and maturation. *Nat Rev Microbiol* **13**:484-496.
- 792 8. **Mariana LM, Cristina C, Silvia AG, José LA.** 2001. Mutational analysis of the feline  
793 immunodeficiency virus matrix protein. *Virus Research* **76**:103-113.
- 794 9. **Abdusetir Cerfoglio JC, González SA, Affranchino JLL.** 2014. Structural elements in the Gag  
795 polyprotein of feline immunodeficiency virus involved in Gag self-association and assembly. *The*  
796 *Journal of general virology* **95**:2050-2059.
- 797 10. **Mariana LM, María LR, Silvia AG, José LA.** 2004. Functional domains in the feline  
798 immunodeficiency virus nucleocapsid protein. *Virology* **327**:83-92.
- 799 11. **Benjamin GL, Miranda S-X, Dimiter GD, Catherine SA, Ferri S, Kunio N, Andrew GS,**  
800 **Robert JF, Eric OF.** 2008. Molecular Characterization of Feline Immunodeficiency Virus  
801 Budding. *Journal of Virology* **82**:2106-2119.

- 802 12. **Elder JH, Schnölzer M, Hasselkus-Light CS, Henson M, Lerner DA, Phillips TR, Wagaman**  
803 **PC, Kent SB.** 1993. Identification of proteolytic processing sites within the Gag and Pol  
804 polyproteins of feline immunodeficiency virus. *Journal of virology* **67**:1869-1876.
- 805 13. **Lingappa JR, Reed JC, Tanaka M, Chutiraka K, Robinson BA.** 2014. How HIV-1 Gag  
806 assembles in cells: Putting together pieces of the puzzle. *Virus Res*  
807 doi:10.1016/j.virusres.2014.07.001.
- 808 14. **Patarca R, Haseltine WA.** 1985. A major retroviral core protein related to EPA and TIMP.  
809 *Nature* **318**:390.
- 810 15. **Orlinsky KJ, Gu J, Hoyt M, Sandmeyer S, Menees TM.** 1996. Mutations in the Ty3 major  
811 homology region affect multiple steps in Ty3 retrotransposition. *J Virol* **70**:3440-3448.
- 812 16. **Gamble TR, Yoo S, Vajdos FF, von Schwedler UK, Worthylake DK, Wang H, McCutcheon**  
813 **JP, Sundquist WI, Hill CP.** 1997. Structure of the carboxyl-terminal dimerization domain of the  
814 HIV-1 capsid protein. *Science* **278**:849-853.
- 815 17. **Schur FK, Hagen WJ, Rumlova M, Ruml T, Muller B, Krausslich HG, Briggs JA.** 2015.  
816 Structure of the immature HIV-1 capsid in intact virus particles at 8.8 Å resolution. *Nature*  
817 **517**:505-508.
- 818 18. **Khwaja A, Galilee M, Marx A, Alian A.** 2016. Structure of FIV capsid C-terminal domain  
819 demonstrates lentiviral evasion of genetic fragility by coevolved substitutions. *Sci Rep* **6**:24957.
- 820 19. **Goldstone DC, Yap MW, Robertson LE, Haire LF, Taylor WR, Katzourakis A, Stoye JP,**  
821 **Taylor IA.** 2010. Structural and functional analysis of prehistoric lentiviruses uncovers an  
822 ancient molecular interface. *Cell Host Microbe* **8**:248-259.
- 823 20. **Lingappa JR, Hill RL, Wong ML, Hegde RS.** 1997. A multistep, ATP-dependent pathway for  
824 assembly of human immunodeficiency virus capsids in a cell-free system. *J Cell Biol* **136**:567-  
825 581.



- 826 21. **Dooher JE, Schneider BL, Reed JC, Lingappa JR.** 2007. Host ABCE1 is at Plasma Membrane  
827 HIV Assembly Sites and Its Dissociation from Gag is Linked to Subsequent Events of Virus  
828 Production. *Traffic* **8**:195-211.
- 829 22. **Robinson BA, Reed JC, Geary CD, Swain JV, Lingappa JR.** 2014. A temporospatial map that  
830 defines specific steps at which critical surfaces in the Gag MA and CA domains act during  
831 immature HIV-1 capsid assembly in cells. *J Virol* **88**:5718-5741.
- 832 23. **Lingappa JR, Dooher JE, Newman MA, Kiser PK, Klein KC.** 2006. Basic residues in the  
833 nucleocapsid domain of Gag are required for interaction of HIV-1 gag with ABCE1 (HP68), a  
834 cellular protein important for HIV-1 capsid assembly. *J Biol Chem* **281**:3773-3784.
- 835 24. **Klein KC, Reed JC, Tanaka M, Nguyen VT, Giri S, Lingappa JR.** 2011. HIV Gag-leucine  
836 zipper chimeras form ABCE1-containing intermediates and RNase-resistant immature capsids  
837 similar to those formed by wild-type HIV-1 Gag. *J Virol* **85**:7419-7435.
- 838 25. **Tanaka M, Robinson BA, Chutiraka K, Geary CD, Reed JC, Lingappa JR.** 2015. Mutations  
839 of Conserved Residues in the Major Homology Region Arrest Assembling HIV-1 Gag as a  
840 Membrane-Targeted Intermediate Containing Genomic RNA and Cellular Proteins. *J Virol*  
841 **90**:1944-1963.
- 842 26. **Zimmerman C, Klein KC, Kiser PK, Singh ARS, Firestein BL, Riba SC, Lingappa JR.**  
843 2002. Identification of a host protein essential for assembly of immature HIV-1 capsids. *Nature*  
844 **415**:88-92.
- 845 27. **Reed JC, Molter B, Geary CD, McNevin J, McElrath J, Giri S, Klein KC, Lingappa JR.**  
846 2012. HIV-1 Gag co-opts a cellular complex containing DDX6, a helicase that facilitates capsid  
847 assembly. *J Cell Biol* **198**:439-456.
- 848 28. **Engeland CE, Brown NP, Borner K, Schumann M, Krause E, Kaderali L, Muller GA,**  
849 **Krausslich HG.** 2014. Proteome analysis of the HIV-1 Gag interactome. *Virology* **460-461**:194-  
850 206.

- 851 29. **Kedersha N, Anderson P.** 2007. Mammalian stress granules and processing bodies. *Methods*  
852 *Enzymol* **431**:61-81.
- 853 30. **Ostareck DH, Naarmann-de Vries IS, Ostareck-Lederer A.** 2014. DDX6 and its orthologs as  
854 modulators of cellular and viral RNA expression. *Wiley Interdiscip Rev RNA* **5**:659-678.
- 855 31. **Dooher JE, Lingappa JR.** 2004. Conservation of a step-wise, energy-sensitive pathway  
856 involving HP68 for assembly of primate lentiviral capsids in cells. *J Virol* **78**:1645-1656.
- 857 32. **Lingappa UF, Wu X, Macieik A, Yu SF, Atuegbu A, Corpuz M, Francis J, Nichols C,**  
858 **Calayag A, Shi H, Ellison JA, Harrell EK, Asundi V, Lingappa JR, Prasad MD, Lipkin WI,**  
859 **Dey D, Hurt CR, Lingappa VR, Hansen WJ, Rupprecht CE.** 2013. Host-rabies virus protein-  
860 protein interactions as druggable antiviral targets. *Proceedings of the National Academy of*  
861 *Sciences of the United States of America* **110**:E861-868.
- 862 33. **Talbott RL, Sparger EE, Lovelace KM, Fitch WM, Pedersen NC, Luciw PA, Elder JH.**  
863 1989. Nucleotide sequence and genomic organization of feline immunodeficiency virus.  
864 *Proceedings of the National Academy of Sciences of the United States of America* **86**:5743-5747.
- 865 34. **Waters AK, De Parseval AP, Lerner DL, Neil JC, Thompson FJ, Elder JH.** 1996. Influence  
866 of ORF2 on host cell tropism of feline immunodeficiency virus. *Virology* **215**:10-16.
- 867 35. **Hind JF, Dyana TS, Eric MP.** 2012. Construction and Testing of orfA +/- FIV Reporter  
868 Viruses. *Viruses* **4**:184-199.
- 869 36. **Poeschla EM, Wong-Staal F, Looney DJ.** 1998. Efficient transduction of nondividing human  
870 cells by feline immunodeficiency virus lentiviral vectors. Efficient transduction of nondividing  
871 human cells by feline immunodeficiency virus lentiviral vectors **4**.
- 872 37. **Lin Y-C, Brik A, Parseval Ad, Tam K, Torbett BE, Wong C-H, Elder JH.** 2006. Altered Gag  
873 Polyprotein Cleavage Specificity of Feline Immunodeficiency Virus/Human Immunodeficiency  
874 Virus Mutant Proteases as Demonstrated in a Cell-Based Expression System. *Altered Gag*  
875 *Polyprotein Cleavage Specificity of Feline Immunodeficiency Virus/Human Immunodeficiency*  
876 *Virus Mutant Proteases as Demonstrated in a Cell-Based Expression System* **80**.

- 877 38. **Gottlinger HG, Dorfman T, Sodroski JG, Haseltine WA.** 1991. Effect of mutations affecting  
878 the p6 gag protein on human immunodeficiency virus particle release. *Proc Natl Acad Sci U S A*  
879 **88**:3195-3199.
- 880 39. **Huang M, Orenstein JM, Martin MA, Freed EO.** 1995. p6Gag is required for particle  
881 production from full-length human immunodeficiency virus type 1 molecular clones expressing  
882 protease. *J Virol* **69**:6810-6818.
- 883 40. **Demirov DG, Orenstein JM, Freed EO.** 2002. The late domain of human immunodeficiency  
884 virus type 1 p6 promotes virus release in a cell type-dependent manner. *J Virol* **76**:105-117.
- 885 41. **Chu HH, Chang YF, Wang CT.** 2006. Mutations in the alpha-helix directly C-terminal to the  
886 major homology region of human immunodeficiency virus type 1 capsid protein disrupt Gag  
887 multimerization and markedly impair virus particle production. *J Biomed Sci* **13**:645-656.
- 888 42. **Joshi A, Nagashima K, Freed EO.** 2006. Mutation of dileucine-like motifs in the human  
889 immunodeficiency virus type 1 capsid disrupts virus assembly, gag-gag interactions, gag-  
890 membrane binding, and virion maturation. *J Virol* **80**:7939-7951.
- 891 43. **Ono A, Waheed AA, Joshi A, Freed EO.** 2005. Association of human immunodeficiency virus  
892 type 1 gag with membrane does not require highly basic sequences in the nucleocapsid: use of a  
893 novel Gag multimerization assay. *J Virol* **79**:14131-14140.
- 894 44. **von Schwedler UK, Stray KM, Garrus JE, Sundquist WI.** 2003. Functional surfaces of the  
895 human immunodeficiency virus type 1 capsid protein. *J Virol* **77**:5439-5450.
- 896 45. **Grover JR, Llewellyn GN, Soheilian F, Nagashima K, Veatch SL, Ono A.** 2013. Roles played  
897 by capsid-dependent induction of membrane curvature and Gag-ESCRT interactions in tetherin  
898 recruitment to HIV-1 assembly sites. *J Virol* **87**:4650-4664.
- 899 46. **Schur FK, Obr M, Hagen WJ, Wan W, Jakobi AJ, Kirkpatrick JM, Sachse C, Krausslich**  
900 **HG, Briggs JA.** 2016. An atomic model of HIV-1 capsid-SP1 reveals structures regulating  
901 assembly and maturation. *Science* **353**:506-508.

- 902 47. **Esteva MJJ, Affranchino JLL, González SA.** 2014. Lentiviral Gag assembly analyzed through  
903 the functional characterization of chimeric simian immunodeficiency viruses expressing different  
904 domains of the feline immunodeficiency virus capsid protein. *PloS one* **9**.
- 905 48. **Soderberg O, Gullberg M, Jarvius M, Ridderstrale K, Leuchowius KJ, Jarvius J, Wester K,**  
906 **Hydbring P, Bahram F, Larsson LG, Landegren U.** 2006. Direct observation of individual  
907 endogenous protein complexes in situ by proximity ligation. *Nat Methods* **3**:995-1000.
- 908 49. **Anderson P, Kedersha N.** 2006. RNA granules. *J Cell Biol* **172**:803-808.
- 909 50. **Beckham CJ, Parker R.** 2008. P bodies, stress granules, and viral life cycles. *Cell Host Microbe*  
910 **3**:206-212.
- 911 51. **Eulalio A, Behm-Ansmant I, Izaurralde E.** 2007. P bodies: at the crossroads of post-  
912 transcriptional pathways. *Nat Rev Mol Cell Biol* **8**:9-22.
- 913 52. **Verschoor A, Warner JR, Srivastava S, Grassucci RA, Frank J.** 1998. Three-dimensional  
914 structure of the yeast ribosome. *Nucleic Acids Res* **26**:655-661.
- 915 53. **Chatel-Chaix L, Clement JF, Martel C, Beriault V, Gagnon A, DesGroseillers L, Mouland**  
916 **AJ.** 2004. Identification of Staufen in the human immunodeficiency virus type 1 Gag  
917 ribonucleoprotein complex and a role in generating infectious viral particles. *Mol Cell Biol*  
918 **24**:2637-2648.
- 919 54. **Abrahamyan LG, Chatel-Chaix L, Ajanian L, Milev MP, Monette A, Clement JF, Song R,**  
920 **Lehmann M, DesGroseillers L, Laughrea M, Boccaccio G, Mouland AJ.** 2010. Novel  
921 Staufen1 ribonucleoproteins prevent formation of stress granules but favour encapsidation of  
922 HIV-1 genomic RNA. *J Cell Sci* **123**:369-383.
- 923 55. **Bouttier M, Saumet A, Peter M, Cournaud V, Schmidt U, Cazevielle C, Bertrand E,**  
924 **Lecellier CH.** 2011. Retroviral GAG proteins recruit AGO2 on viral RNAs without affecting  
925 RNA accumulation and translation. *Nucleic acids research* doi:10.1093/nar/gkr762.

- 926 56. **Izumi T, Burdick R, Shigemi M, Plisov S, Hu WS, Pathak VK.** 2013. Mov10 and  
927 APOBEC3G localization to processing bodies is not required for virion incorporation and  
928 antiviral activity. *J Virol* **87**:11047-11062.
- 929 57. **Cinti A, Le Sage V, Ghanem M, Mouland AJ.** 2016. HIV-1 Gag Blocks Selenite-Induced  
930 Stress Granule Assembly by Altering the mRNA Cap-Binding Complex. *MBio* **7**:e00329.
- 931 58. **Valiente-Echeverria F, Melnychuk L, Vyboh K, Ajamian L, Gallouzi IE, Bernard N,**  
932 **Mouland AJ.** 2014. eEF2 and Ras-GAP SH3 domain-binding protein (G3BP1) modulate stress  
933 granule assembly during HIV-1 infection. *Nat Commun* **5**:4819.
- 934 59. **Phalora PK, Sherer NM, Wolinsky SM, Swanson CM, Malim MH.** 2012. HIV-1 replication  
935 and APOBEC3 antiviral activity are not regulated by P bodies. *J Virol* **86**:11712-11724.
- 936 60. **Decker CJ, Parker R.** 2012. P-bodies and stress granules: possible roles in the control of  
937 translation and mRNA degradation. *Cold Spring Harb Perspect Biol* **4**:a012286.
- 938 61. **Sokalingam S, Raghunathan G, Soundrarajan N, Lee SG.** 2012. A study on the effect of  
939 surface lysine to arginine mutagenesis on protein stability and structure using green fluorescent  
940 protein. *PLoS One* **7**:e40410.
- 941 62. **Laco GS, Schalk-Hihi C, Lubkowski J, Morris G, Zdanov A, Olson A, Elder JH, Wlodawer**  
942 **A, Gustchina A.** 1997. Crystal structures of the inactive D30N mutant of feline  
943 immunodeficiency virus protease complexed with a substrate and an inhibitor. *Biochemistry*  
944 **36**:10696-10708.
- 945 63. **Kemler I, Barraza R, Poeschla EM.** 2002. Mapping the encapsidation determinants of feline  
946 immunodeficiency virus. *J Virol* **76**:11889-11903.
- 947 64. **Yamashita M, Emerman M.** 2004. Capsid is a dominant determinant of retrovirus infectivity in  
948 nondividing cells. *J Virol* **78**:5670-5678.
- 949 65. **Vermeire J, Naessens E, Vanderstraeten H, Landi A, Iannucci V, Van Nuffel A, Taghon T,**  
950 **Pizzato M, Verhasselt B.** 2012. Quantification of reverse transcriptase activity by real-time PCR

- 951 as a fast and accurate method for titration of HIV, lenti- and retroviral vectors. PLoS One  
952 7:e50859.
- 953 66. **Biasini M, Bienert S, Waterhouse A, Arnold K, Studer G, Schmidt T, Kiefer F, Gallo**  
954 **Cassarino T, Bertoni M, Bordoli L, Schwede T.** 2014. SWISS-MODEL: modelling protein  
955 tertiary and quaternary structure using evolutionary information. Nucleic Acids Res **42**:W252-  
956 258.
- 957 67. **Kiefer F, Arnold K, Kunzli M, Bordoli L, Schwede T.** 2009. The SWISS-MODEL Repository  
958 and associated resources. Nucleic Acids Res **37**:D387-392.
- 959 68. **Arnold K, Bordoli L, Kopp J, Schwede T.** 2006. The SWISS-MODEL workspace: a web-based  
960 environment for protein structure homology modelling. Bioinformatics **22**:195-201.
- 961 69. **Guex N, Peitsch MC, Schwede T.** 2009. Automated comparative protein structure modeling  
962 with SWISS-MODEL and Swiss-PdbViewer: a historical perspective. Electrophoresis **30 Suppl**  
963 **1**:S162-173.
- 964 70. **Ye Y, Godzik A.** 2003. Flexible structure alignment by chaining aligned fragment pairs allowing  
965 twists. Bioinformatics **19 Suppl 2**:ii246-255.
- 966 71. **Ye Y, Godzik A.** 2004. FATCAT: a web server for flexible structure comparison and structure  
967 similarity searching. Nucleic Acids Res **32**:W582-585.
- 968 72. **Winn MD, Ballard CC, Cowtan KD, Dodson EJ, Emsley P, Evans PR, Keegan RM,**  
969 **Krissinel EB, Leslie AG, McCoy A, McNicholas SJ, Murshudov GN, Pannu NS, Potterton**  
970 **EA, Powell HR, Read RJ, Vagin A, Wilson KS.** 2011. Overview of the CCP4 suite and current  
971 developments. Acta Crystallogr D Biol Crystallogr **67**:235-242.
- 972 73. **Li W, Cowley A, Uludag M, Gur T, McWilliam H, Squizzato S, Park YM, Buso N, Lopez R.**  
973 2015. The EMBL-EBI bioinformatics web and programmatic tools framework. Nucleic Acids  
974 Res **43**:W580-584.
- 975

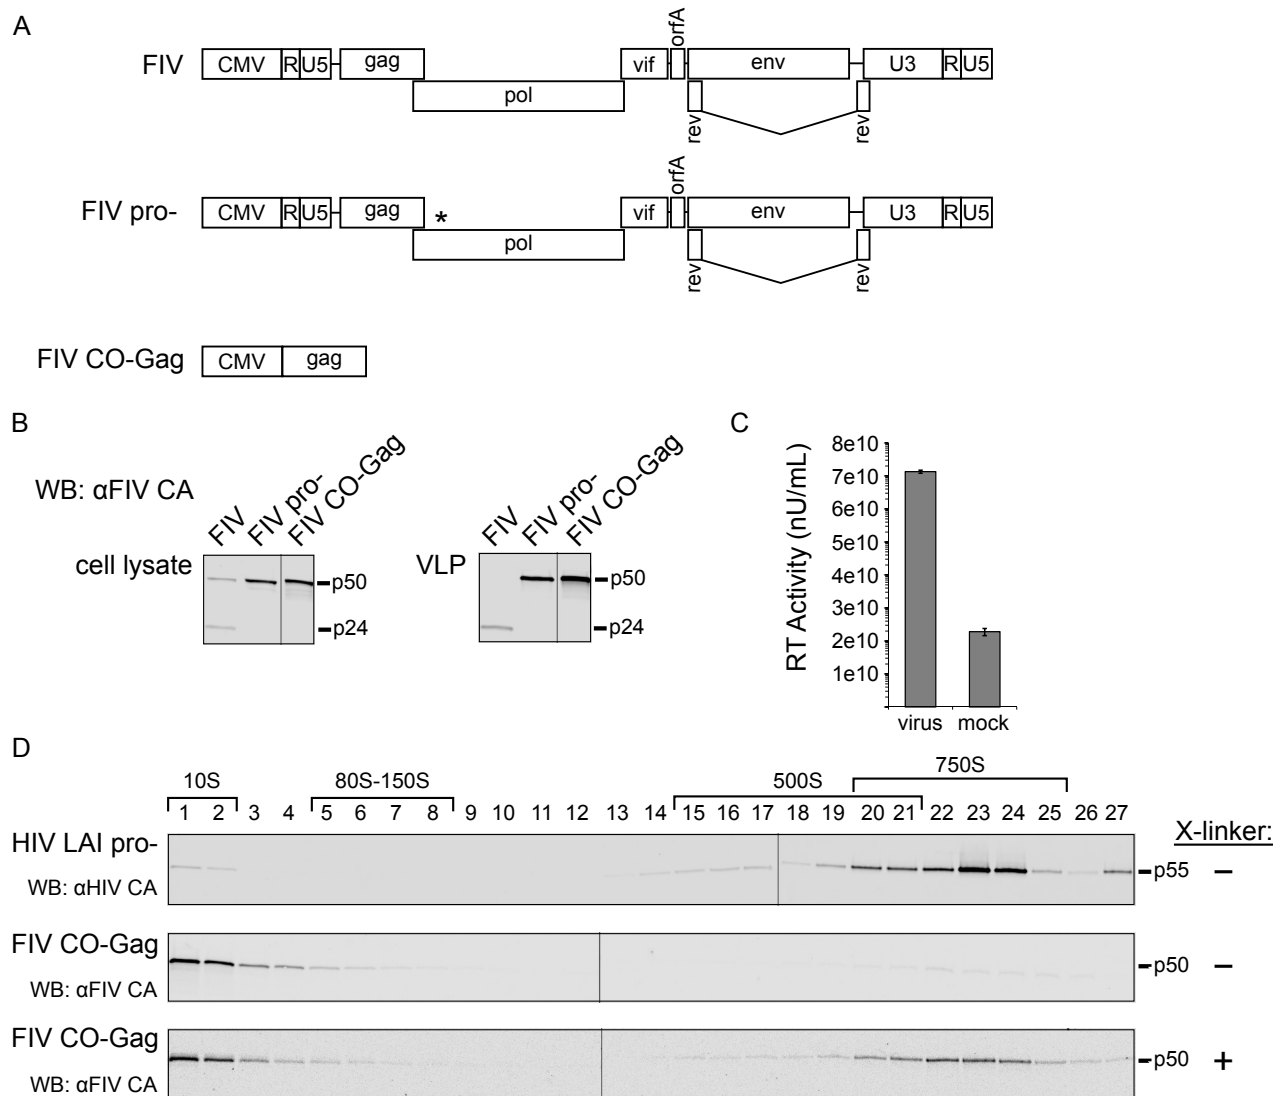

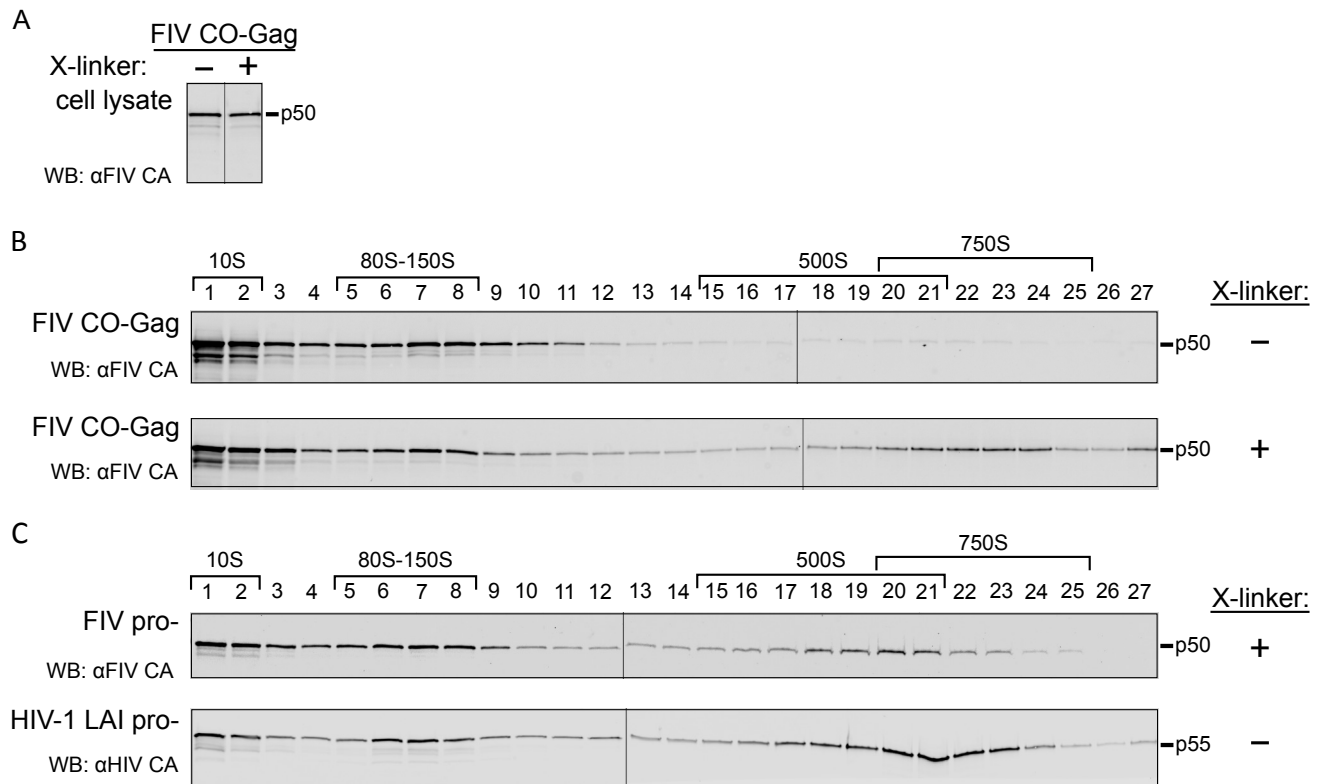

**Figure 2. FIV produces intermediates in cells that are similar in size to HIV-1 assembly intermediates.**

(A) Analysis of cell lysates from G355-5 cells transfected with FIV CO-Gag that were either mock treated or treated with DSP cross-linker (X-linker) prior to harvest. WB was performed with an antibody to FIV CA-CTD (αFIV CA) and bands were taken from a single exposure of film. (B) Cell lysates blotted in panel A were subjected to velocity sedimentation in parallel, and gradient fractions were analyzed by WB with αFIV CA. (C) Cell lysates from G355-5 cells transfected with FIV pro- that were cross-linked prior to harvest or COS-1 cells transfected with HIV-1 LAI pro- were subjected to velocity sedimentation. Gradient fractions were analyzed by WB with αFIV CA or an antibody to HIV Gag CA-CTD (αHIV CA). Symbols (+/-) at right indicate whether VLPs were cross-linked with DSP prior to removal of the viral envelope. The approximate S-values of FIV Gag complexes and HIV-1 assembly intermediates are indicated with brackets above the WB, and expected migrations of HIV-1 Gag p55 and FIV Gag p50 are shown to the right.



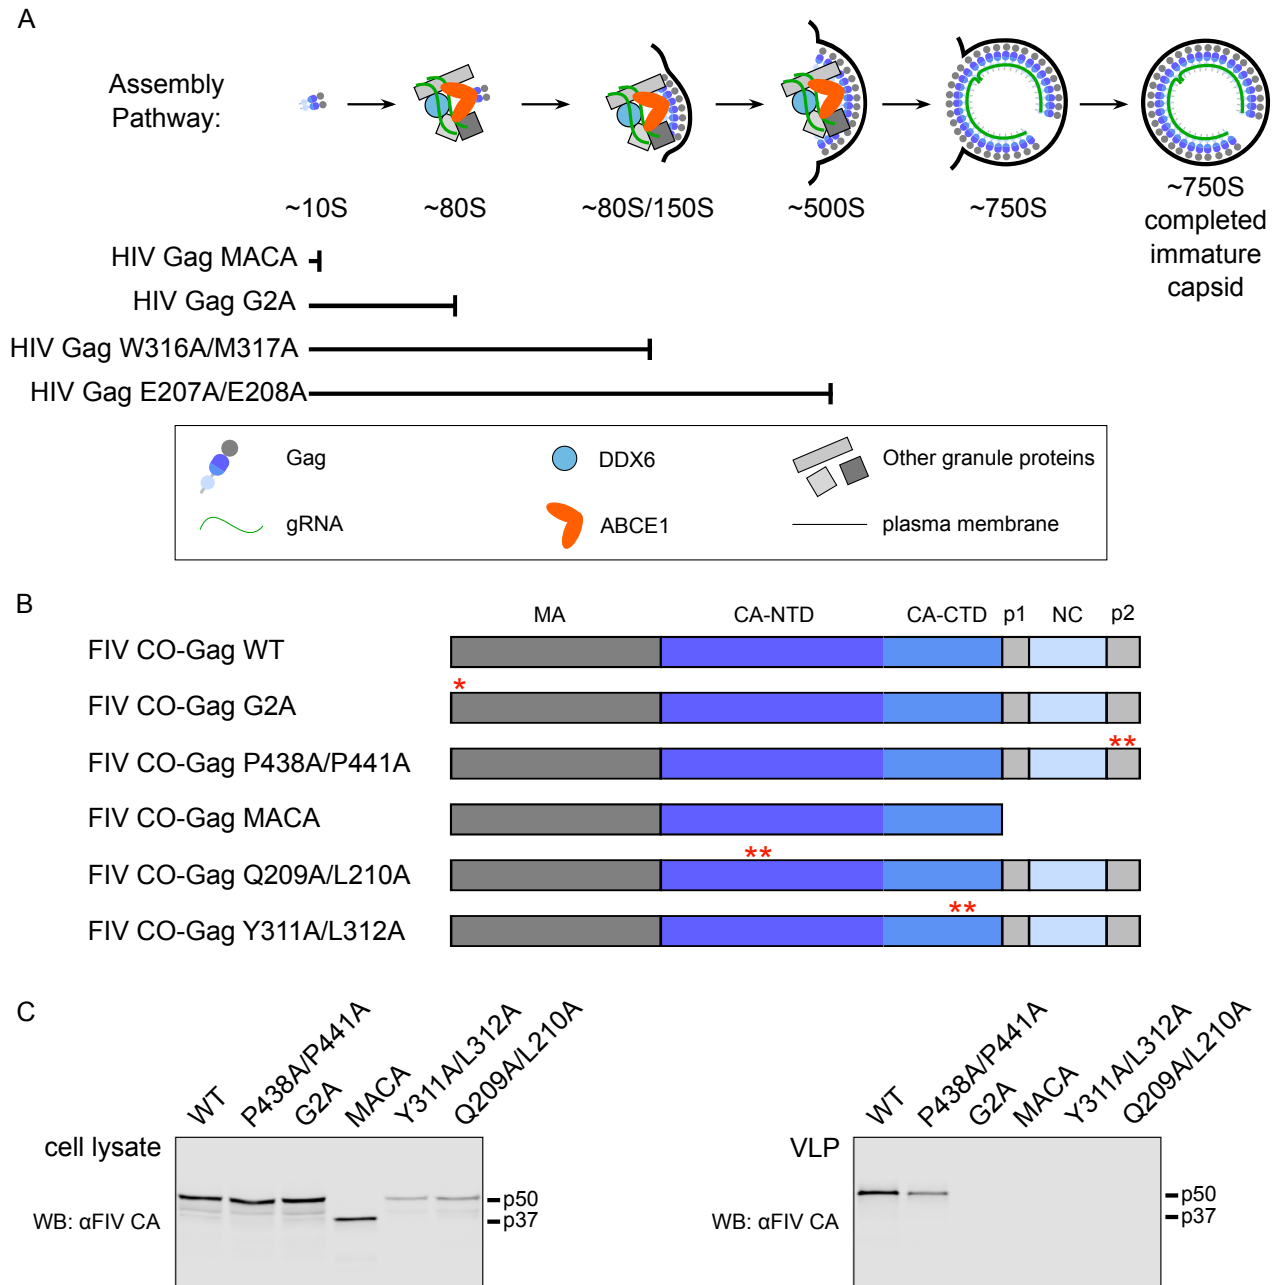

**Figure 3. Defining VLP phenotypes of FIV Gag mutants.** (A) HIV-1 assembly pathway showing the step at which specific HIV-1 Gag mutants are known to be arrested (22). The legend (in box) shows colors and symbols representing HIV-1 Gag, genomic RNA (gRNA), DDX6, ABCE1, other granule proteins, and the plasma membrane. Point mutations are numbered relative to the start of HIV-1 Gag. (B) Diagram of WT FIV Gag and FIV Gag mutants used in this study, with point mutations indicated by red asterisks. MA, dark grey; CA-CTD, dark blue; CA-NTD, blue; NC, light blue; spacer peptide (p1) and late domain (p2), light grey. FIV viral protease cleavage sites are diagramed as vertical black lines and the names of Gag domains are indicated above the diagrams. Mutated residues are numbered relative to the start of Gag. (C) Equivalent aliquots of cell lysates and pelleted virus-like particles (VLP) from G355-5 cells transfected with WT FIV CO-Gag or the indicated FIV CO-Gag mutants were analyzed by WB with an antibody to FIV CA-CTD (αFIV CA). Expected migrations for full-length (p50) and MACA (p37) Gag proteins are shown to the right. Data shown are from a single experiment and is representative of two repeats.

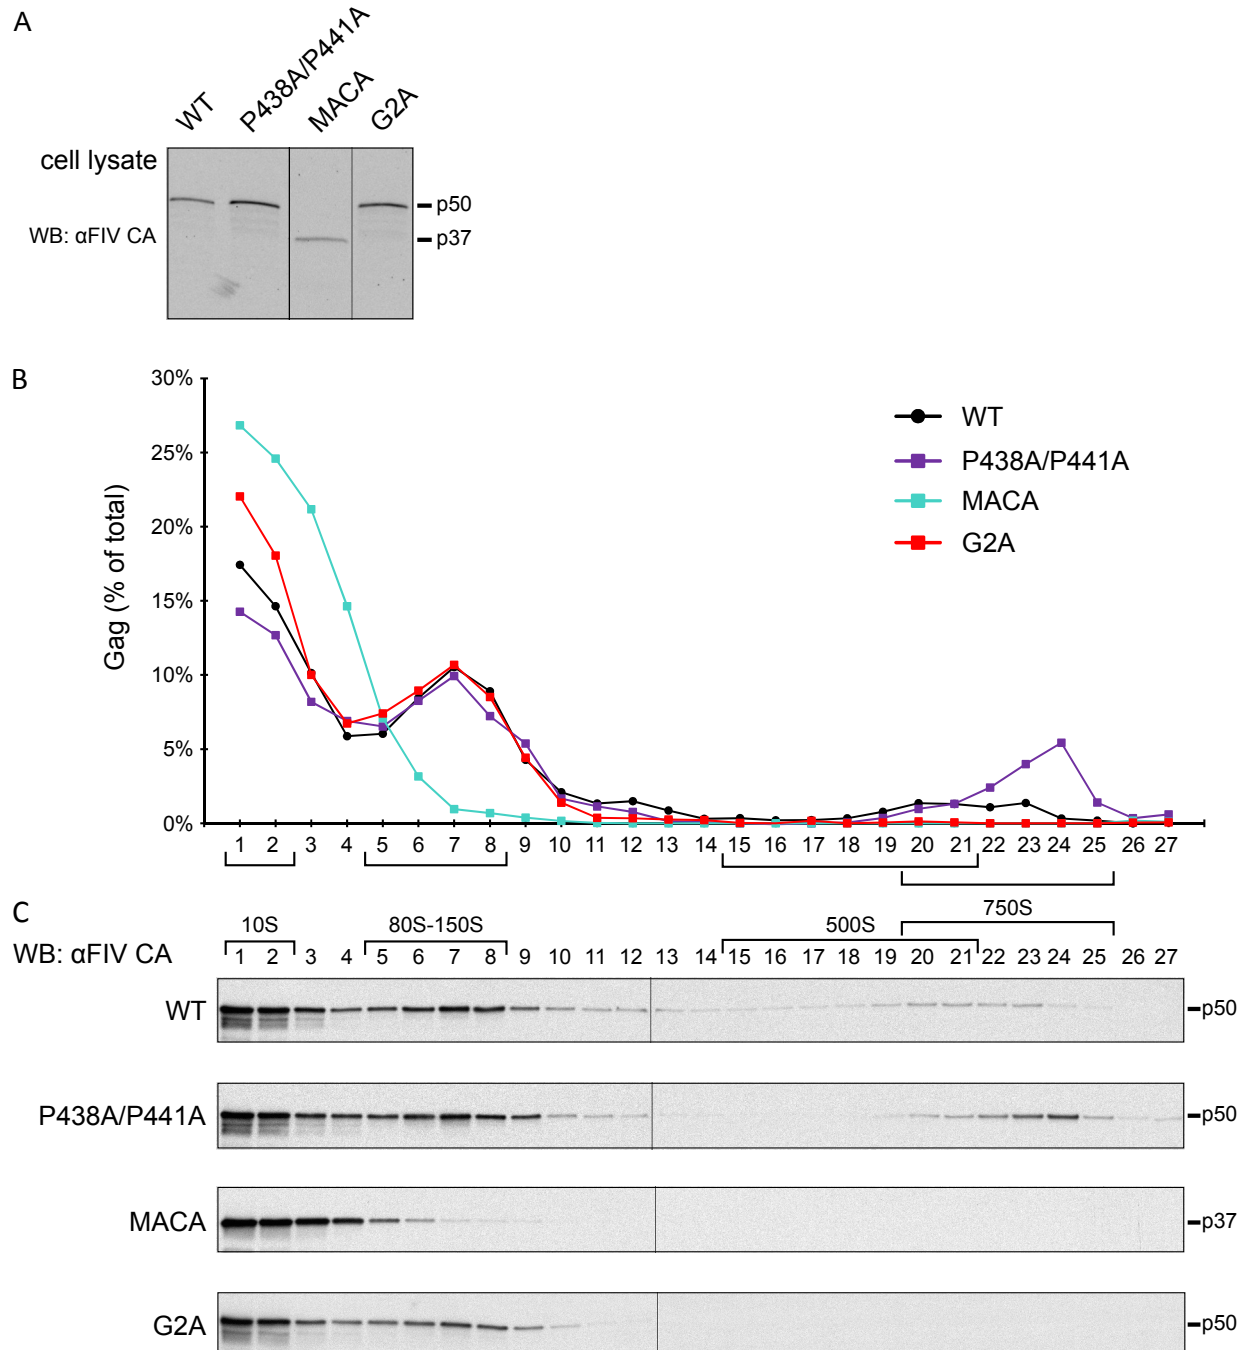

**Figure 4. Assembly-defective FIV Gag MACA and G2A are arrested at putative assembly intermediates.** (A) Equivalent aliquots of cell lysate from G355-5 cells transfected with FIV CO-Gag WT or indicated FIV CO-Gag mutants were analyzed for steady-state FIV Gag expression by WB with an antibody to FIV CA-CTD ( $\alpha$ FIV CA). (B, C) Lysates shown in panel A above were also subjected to velocity sedimentation and gradient fractions analyzed by WB with  $\alpha$ FIV CA. Graph displays quantification of blots shown in panel C, with the amount of Gag in each fraction shown as a percentage of total Gag in the gradient. The approximate S-values of FIV Gag-containing complexes are indicated with brackets below the graph and above the gradient WB, and expected migrations for full-length (p50) and MACA (p37) Gag proteins are shown to the right. Data shown are from a single experiment and are representative of two repeats.

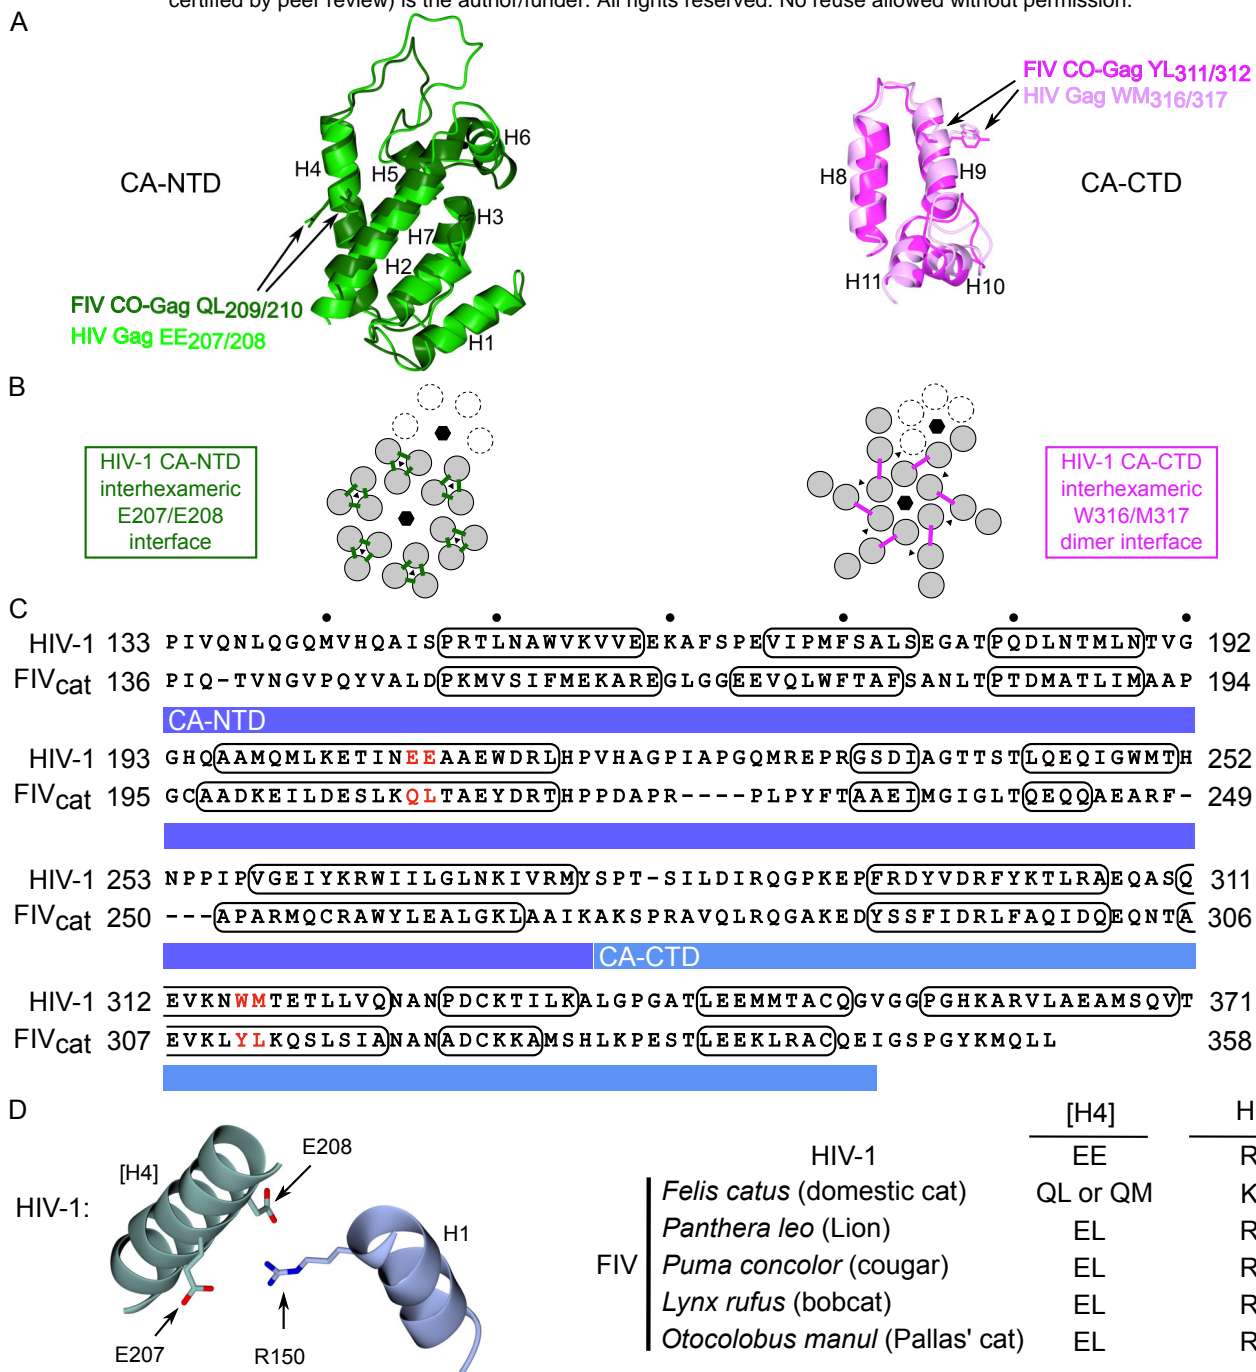

**Figure 5. Structural homology modeling allows identification of candidate CA residues critical for FIV capsid assembly.** (A) Superposition of HIV-1 CA-NTD (light green; PDB accession number 5L93) and a homology modeled structure of FIV CA-NTD (dark green) using RELIK CA-NTD as a template (PDB accession number 2XGU) at left; and HIV-1 CA-CTD (light pink; PDB accession number 5L93) and FIV CA-CTD (dark pink; PDB accession number 5DCK) at right. Side chains of FIV residues selected for mutation, and their HIV-1 counterparts, are shown in the same color as the main chain. CA alpha helices 1-11 are numbered (H1-H11). (B) Diagram of the HIV-1 immature capsid structure depicting the six-fold and three-fold points of symmetry in the CA-NTD layer (black hexagons and black triangles, respectively; at left) and CA-CTD layer (at right), which were previously identified in a high-resolution structure of the completed immature capsid (46). Dotted subunits indicate an adjacent hexamer. The HIV-1 CA-NTD inter-hexameric interface studied here is shown by green lines, but is shown only for the central hexamer. The HIV-1 CA-CTD inter-hexameric interface studied here is shown by pink lines, but is shown only for the central hexamer. (C) Sequence alignment is based on a structural alignment of CA-NTD and CA-CTD from sources described in section A above. Numbering at right and left of each line is from the start of Gag. Residues forming alpha-helical structures are outlined with black ovals. CA-NTD and CA-CTD are highlighted with a dark blue and light blue bar respectively. Red letters indicate residues chosen for mutation (Q209A/L210A and Y311A/L312A). (D) Diagram of the residues proposed to form a salt bridge in the HIV-1 immature capsid structure (R150 in helix 1 (H1) with E207/E208 in helix 4 ([H4]); brackets indicate helix in neighboring 3-fold symmetry mate; adapted from (46)). Table lists consensus residues at these positions in helix 4 and helix 1 for HIV-1, FIV *Felis catus* (domestic cat), FIV *Panthera leo* (lion), FIV *Puma concolor* (cougar), FIV *Lynx rufus* (bobcat), FIV *Otocolobus manul* (Pallas' cat).

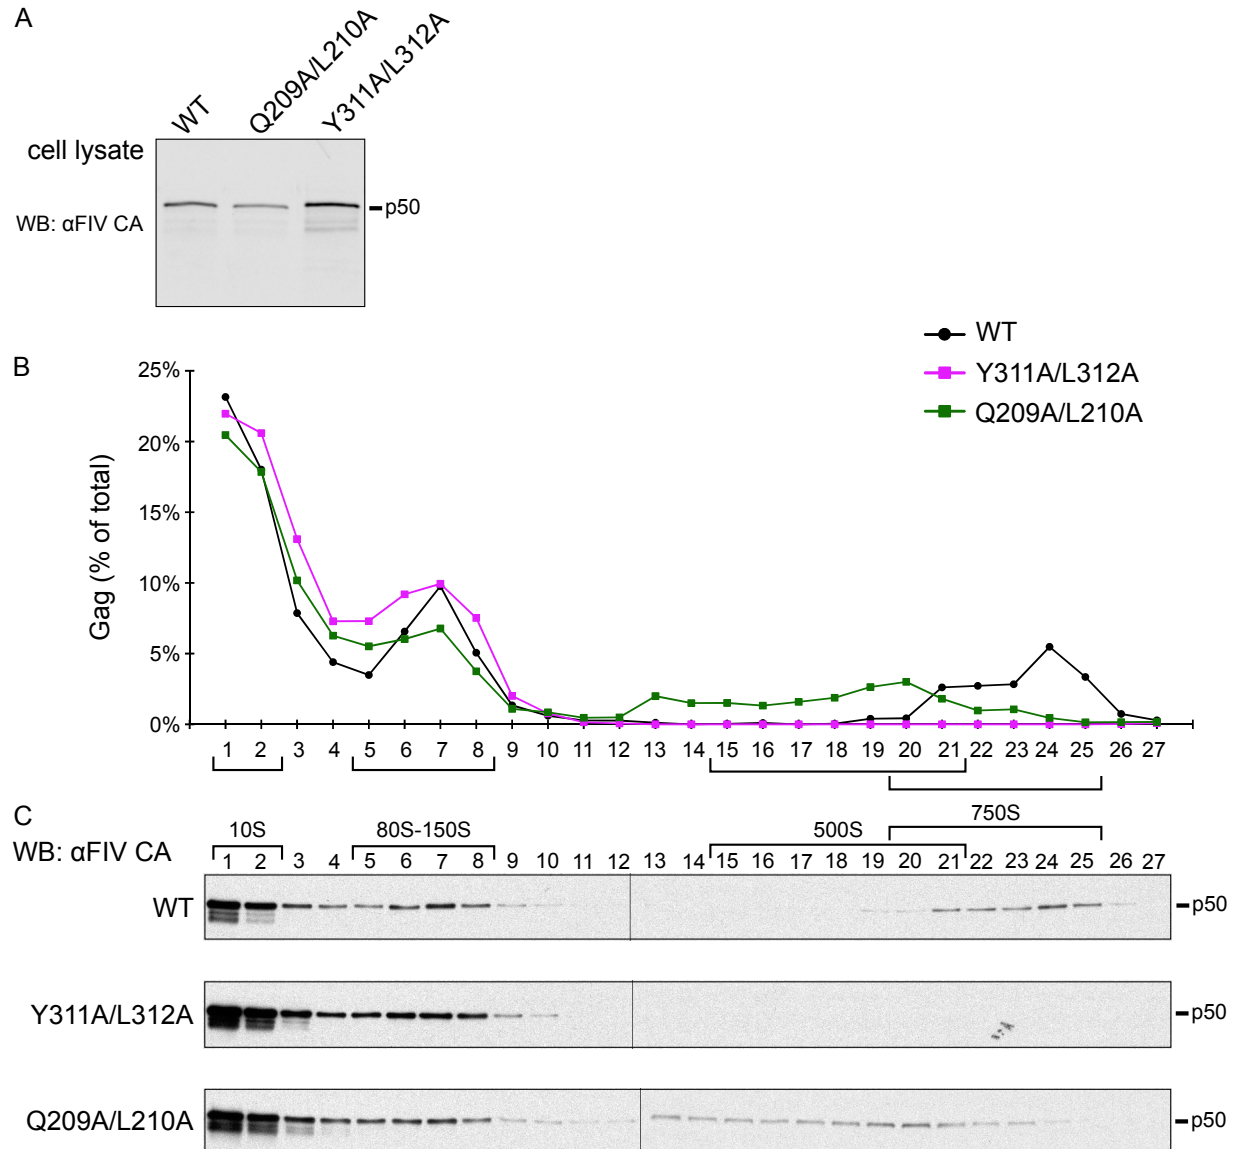

**Figure 6. Assembly-defective FIV Gag CA-NTD and CA-CTD mutants are arrested at putative assembly intermediates.** (A) Equivalent aliquots of cell lysate from G355-5 cells transfected with FIV CO-Gag WT or indicated FIV CO-Gag mutants were analyzed for steady-state FIV Gag expression by WB with an antibody to FIV CA-CTD (αFIV CA). (B, C) Lysates shown in panel A above were also subjected to velocity sedimentation and gradient fractions analyzed by WB with αFIV CA. Graph displays quantification of blots shown in panel C, with the amount of Gag in each fraction shown as a percentage of total Gag in the gradient. The approximate S-values of FIV Gag-containing complexes are indicated with brackets below the graph and above the gradient WB, and expected migration for full length (p50) Gag protein are shown to the right. Data shown are from a single experiment and are representative of two repeats.

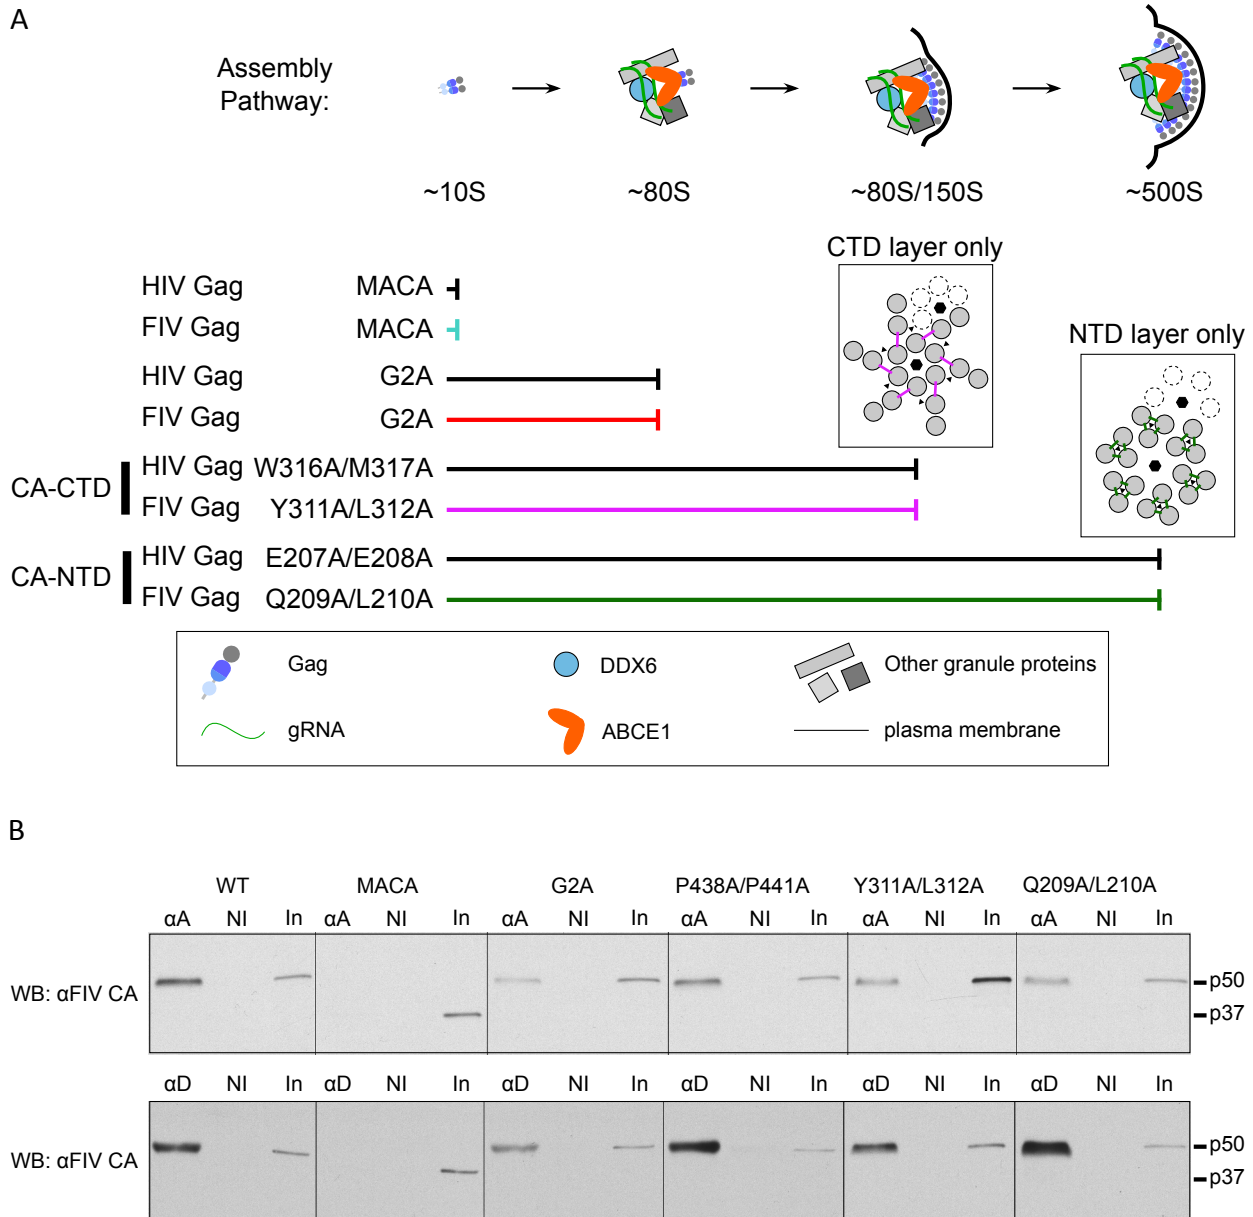

**Figure 7. FIV Gag, like HIV-1 Gag, is associated with both ABCE1 and DDX6 by co-immunoprecipitation.**

(A) FIV assembly pathway model showing that FIV Gag mutants are arrested in the assembly pathway at the same points as their HIV-1 counterparts. Located above the point of arrest of the CA-CTD mutations and the CA-NTD mutations are diagrams of the HIV-1 immature capsid structure showing either the HIV-1 CA-CTD layer only (left) or the HIV-1 CA-NTD layer only (right). The six-fold and three-fold points of symmetry are indicated (black hexagons and black triangles, respectively) and the dotted subunits indicate an adjacent hexamer. The HIV-1 CA-NTD inter-hexameric interface studied here is shown by green lines, but is shown only for the central hexamer. The HIV-1 CA-CTD inter-hexameric interface studied here is shown by pink lines, but is shown only for the central hexamer. These diagrams are based on the high-resolution structure of the immature capsid described in (46). The legend (in box) shows colors and symbols representing Gag (FIV or HIV-1), genomic RNA (gRNA), DDX6, ABCE1, other granule proteins, and the plasma membrane. (B) Lysates of G355-5 cells transfected with the indicated constructs were subjected to immunoprecipitation with an antibody to ABCE1 (αA) or an antibody to DDX6 (αD) alongside a non-immune (NI) control. Immunoprecipitation eluates and an aliquot of input (In) were analyzed by WB with an antibody to FIV CA-CTD (αFIV CA).



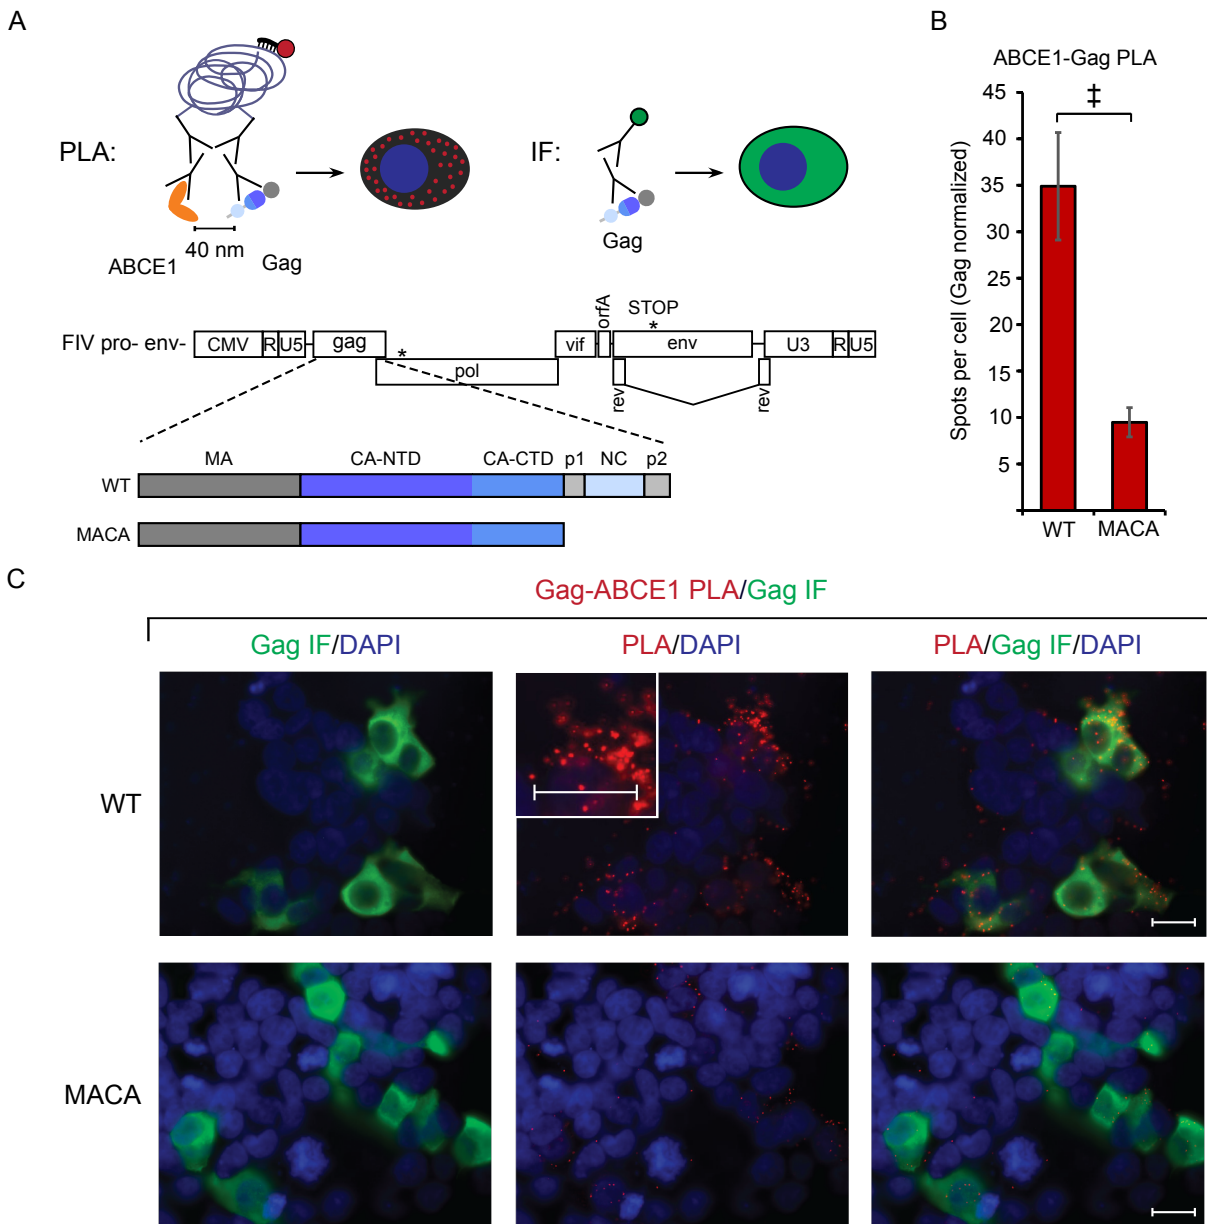

**Figure 8. PLA confirms co-localization of FIV Gag and ABCE1 *in situ* upon provirus expression.** PLA spots indicate regions in which Gag is within 40 nm from ABCE1 *in situ*, with concurrent  $\alpha$ Gag immunofluorescence (IF) allowing quantification of intracellular Gag levels. (A) Experimental schematic showing fluorophore detection of the rolling-circle amplification product from ligated oligonucleotides attached to mouse and rabbit secondary antibodies. These detect primary antibodies directed against FIV Gag and ABCE1. Also shown is the gene map of the FIV pro- env- proviral construct, with the point mutation in protease and premature stop codon in env marked by asterisks. PLA experiments utilized the FIV pro- env- provirus encoding either WT Gag or MACA, diagrammed below the gene map. (B) Following transfection of these proviruses into 293T cells and processing for PLA, the average number of PLA spots per cell was determined for all Gag-IF-positive cells in five randomly chosen fields, and normalized to Gag levels as measured by IF signal intensity. Error bars indicate SEM. Double cross indicates a significant difference relative to WT ( $p < 0.01$  in a two-tailed, paired t-test). (C) Panels show representative images from each transfection. Columns from left to right for each construct: Gag IF (green) with DAPI-stained nuclei (blue), FIV Gag-ABCE1 PLA signal (red) with DAPI-stained nuclei (blue), and a merge of images in the first two columns. The center PLA panel in the top row contains an inset showing a high magnification view of the cell to the right of the inset. Scale bars, 5  $\mu$ m.
